# Supplementary material
Source: PubMed Central journal article supplement (PMC1369146)
Supplement: 6-7400479-s1.pdf [file 6-7400479-s1.pdf]

**Supplementary Fig S1** | Sequence alignment of orthologues of human ATM (gi 13878337) from *A. thaliana* (gi 11357182), *S. cerevisiae* (Tel1p, gi 586447), and *C. elegans* (gi 7494793). Sequences were aligned using ClustalX.

```
A.thaliana      : MKLQNPDKKTLREGFSQESSVVALDSGVLAMSGLKCDGKFPVKDVLMEE : 49
H.sapiens       : ----- : -
S.cerevisiae    : ----- : -
C.elegans       : ----- : -
```

```
A.thaliana      : GGDKVRKIQVSGGNISLVVDFSGARTSSNNFFESNASCVNENLVKNGY : 98
H.sapiens       : ----- : -
S.cerevisiae    : ----- : -
C.elegans       : ----- : -
```

```
A.thaliana      : REDETQEFVLVGNLVWVMTKYKKWWPGEVVDKADAKESFMVRSIGQSHL : 147
H.sapiens       : ----- : -
S.cerevisiae    : ----- : -
C.elegans       : ----- : -
```

```
A.thaliana      : VSWFASSKCLKPFKESFEQVLNQRNDNGFFDALQKAMSLLSNSLKLDMTC : 196
H.sapiens       : ----- : -
S.cerevisiae    : ----- : -
C.elegans       : ----- : -
```

```
A.thaliana      : SCIADGNGIVSAQNITTRKNKPLILREFSVDRLEPKFVTQLKNIKCV : 245
H.sapiens       : ----- : -
S.cerevisiae    : ----- : -
C.elegans       : ----- : -
```

```
A.thaliana      : LNAGVLESTVMQSQLSAFYTLFGHKQIPMAQLHENEGRKSFTAKMSDSK : 294
H.sapiens       : ----- : -
S.cerevisiae    : ----- : -
C.elegans       : ----- : -
```

A.thaliana : FIGSPSICAGNSRKRFRKEWFRKFVSEVDNVSARDDLNVNPPSDLISKL : 343  
H.sapiens : ----- : -  
S.cerevisiae : ----- : -  
C.elegans : ----- : -

A.thaliana : KLLAVGYNCSEETENIGLFEWFFSKFRISVYHDENAYKMQLANMAGFKD : 392  
H.sapiens : ----- : -  
S.cerevisiae : ----- : -  
C.elegans : ----- : -

A.thaliana : LMLATNANRGTVQKTLKSKKIGKSKMEPLNGVSVADTEQKTFELQISKK : 441  
H.sapiens : ----- : -  
S.cerevisiae : ----- : -  
C.elegans : ----- : -

A.thaliana : SNIESLNGVSVADTEQKTFELQILEKSNIESLNGVSTPNIDHEASKSNN : 490  
H.sapiens : ----- : -  
S.cerevisiae : ----- : -  
C.elegans : ----- : -

A.thaliana : SGKTKINHIIIGHSNFPSSVAKVQLAKDFQDKLLVQAPDRKAMTADTLR : 539  
H.sapiens : ----- : -  
S.cerevisiae : ----- : -  
C.elegans : ----- : -

A.thaliana : PAAILVPLNSGGNALGTAEFDHMQRPETLIQHNVCPEEKTPRSTILN : 588  
H.sapiens : -----MSLVLNDLLICCRQLEHDRATERKKEVEK : 29  
S.cerevisiae : -----MEDHGIVETLNFLSSTKIKERNNALDE : 27  
C.elegans : -----MLQQHGISFQMNADRQNKAAATTSNRIVS : 28

A.thaliana : FQVTAHQGVSGTQFVSSQPTSYKHFTSADLFTYSGKKRGRKRKNAEEL : 637  
H.sapiens : FKRLIRDPEIKHLDRHS-----DSKQGYLNW : 57  
S.cerevisiae : LTTILKEDPERIPTKALS-----TTA : 48  
C.elegans : APATNEFDERHRKQGIDAAR-----ALAS : 52

A.thaliana : PIVAHASATTGIPDLNGTNTPEPTLVLPQVEPTQRRRRRKKEESPNGLTR : 686  
H.sapiens : DAVFRFLQKYIQKETECLRIAKPNVSASTQASRQKK-----MQ : 95  
S.cerevisiae : EALVELLASEHTKYCDLLRNLTVSTTNKLS-----LS : 80  
C.elegans : QYRSRITENRDANQRQAARELSRYVRSELKDEPNTFS----- : 89

A.thaliana : GITILFLKFSQVSMPSRDDLTSTFSAFGPLDSSETHVSEEFSGAQVAF : 735  
H.sapiens : EISSLVKYFIKCANRR----- : 111  
S.cerevisiae : E----- : 81  
C.elegans : -----DAFLNAIDGR----- : 99

A.thaliana : VSSADAEAVKSLKCANPFGETLVNFRLOQKLITVQORNIAPRMPVISHV : 784  
H.sapiens : APRLKCQELLNYIMDTVK----- : 129  
S.cerevisiae : -NRLSTISYVLRRLFVEKS----- : 98  
C.elegans : -TDIASQSAIYNMCKSNS----- : 116

A.thaliana : SPVPKPNNIPTSMAMRQNLMMTAMLEKSGDSLSRETAKKSEITGL : 833  
H.sapiens : -----DSSNGAIYGADCSNI : 144  
S.cerevisiae : -----CERF : 102  
C.elegans : -----NIDQK : 121

A.thaliana : LEKDGVKLLNTWLEGERSITFCRFLSQNTAKLKLDEIPNAETWPFLVKL : 882  
H.sapiens : LLKDILSVRKYWCEIS---QQWLELFVYFRLYLKPSQDVHRVLR : 189  
S.cerevisiae : KVKTLKLLAVVPELMVKDGSKSLLDVAVSVHLSFALDALIKSDPFKLF : 151  
C.elegans : RAGIYLIVCLAETHSGNVIRYANYLLKMLNNGNGLDEDTVKMASKALAF : 170

A.thaliana : LLQCVSMEVSGSKRRMPKPTFAKTLRVVQRTEETKFPQVQFPILLSMAK : 931  
H.sapiens : ITHAVTKGCCSQT DGLNSKFLDFFSKAIQCARQEKSSSGLNHILAALTI : 238  
S.cerevisiae : MTHQWIS-----LVDKICEYFQSQMKLSMVDKTLTNFISILLNLLA : 192  
C.elegans : LIATCKSYAAELVDRCLDHCHEWLGNVPHSQQPKNQQEIDQIRRLAAS : 219

A.thaliana : TLFTHVHDILSNTPSFQSEYGTILRHLLLEIKEYRFQMRKRTYSSLVLLY : 980  
H.sapiens : FLKTLAVNFRIRVCELGDEILPTLLYIWTQHRLNDSLKEVITELFQLQI : 287  
S.cerevisiae : LDTVGFQVTRTITWTVIDFLRLSKKENGNTLIMSLINQLLTKCHCFS : 241  
C.elegans : HSRELALATPTAFFLRVNLFFKYIFN-AVRDKNPAVRIAGIDALHVVL : 267

A.thaliana : MERAETGFCEKNSGQHSQKEEAFR-YILTQSLLENSPGDFPDDIREEI : 1028  
H.sapiens : YIHHPKGAKTQEKGAYES--TKWRSILYNIYDLLVNEISHIGSRGKYSS : 334  
S.cerevisiae : VIDTLMLIKEAWSYNLTIGCTSNELVQDQLSLFDVMSSELMNHKIPYMI : 290  
C.elegans : TIVSQREAANKTEWFKKCFDEALEGQPNSQKDDLDRWHAVALILNELL : 316

A.thaliana : VNGLIHIFSSVRDEGKLSRKLIECVNTFLLKDGPNLGSLSLEIHNAVEQ : 1077  
H.sapiens : G----- : 335  
S.cerevisiae : G----- : 291  
C.elegans : R----- : 317

A.thaliana : FVFRCLWLTTHDKNLKEILVSYGRLQNLNLRDSSSESSLVEQLLDVVTRE : 1126  
H.sapiens : -----FRNIAVKENLIELMADICHQVFNEPTRSLEISQS-YTTTQRE : 376  
S.cerevisiae : -----QENYVEELRSESLVSLYREYILLRLSNYKQPQLFTVNHVE : 330  
C.elegans : -----ISDQRFELIRCESSQFIKQKFLKEDEEGVEWLVLTKQ : 355

A.thaliana : LD----LGSSSSS-ASWGDTTKDEKLGALSSYQNSLVELAAHVFYRACV : 1170  
H.sapiens : SSDYSVPCRRKIKIELGWEVIKDHLOKSQNDFDLVPWLQIATQLISKYPA : 425  
S.cerevisiae : FS-YIRGSRDKNSWFALPDFRLRDRGGRSVWLKILGITKSLTYFALNR : 378  
C.elegans : QTIVESVTARKLVLERFPKILDCVRQIIPLANKTSSTKQQSSIYLNVTL : 404

A.thaliana : NTSRPSLSEKRARRQHIAMRMV--DALTEGKWLWCAAFGCLVARNYCARI : 1217  
H.sapiens : SLPNCELSPLLMILSOLLPQQR--HGERTPYVLRCLTEVALCQDKRSNL : 472  
S.cerevisiae : KNEYSLFKRRKCDSDIPILRISDDMDTFLIHLLEENSSHEFEVLGL : 427  
C.elegans : MQLLPRICAFPQCDRTFQTISFDTSFTILQRNAVAAPAIGMMMLSNPDV : 453

A.thaliana : NMDLLIYWFEAICTNFQRLLEDASMRRSYDGLLWTLRSLQGLSSGLSLP : 1266  
H.sapiens : ESSQKSDLLKLWNKIWCITFRGISSEQIQA-----ENFGLIGAIIQGS : 515  
S.cerevisiae : QLCSFYGTLQDFTKSFAEQLKELLFSKFEKIQCENWVCFSEFIPLLSQKE : 476  
C.elegans : HATHIEKTISFISAAIKKTTNSDVLDN-----YFTFLFLFVVDAY : 492

A.thaliana : DITMDISKSSASSSELDRGWQSIWSSLIHGLATFSSMSVIVDAVLVLLG : 1315  
H.sapiens : LVEVDR----EFWKIFTGSACRPSCPAVCCITLALTTISIVPGAVKMGIE : 560  
S.cerevisiae : CELSNG----DMARLFKVCLPLVKSNESEQISCLLLANSIK----- : 513  
C.elegans : HEQVTTQIKAIIPQLMDITLSRSLANVLKMMMRIPKLRNLN----- : 533

A.thaliana : SIISSNHITVKILPQEVWDHQLFRHLPSEPALYFIACYFSRMGCQGNLQ : 1364  
H.sapiens : QNMCEVNRFSFS-LKESIMKWLLFYQLEGD---LENSTEVPP----- : 597  
S.cerevisiae : --FSKQLLSDEKTINQIYDLYELSDIILGP----- : 540  
C.elegans : -----VQDGVMASVYQTLTGSLIPPK----- : 554

A.thaliana : DDLHLRRNLLRAVCAPLSWKVRLTLDERMVQLLPAAAFSLCAGFKVSLP : 1413  
H.sapiens : -----ILHSNFPHLVLEKILVSLTMKNCKAAM : 624  
S.cerevisiae : -----ILVTNESFMLWGYLQYVVGKDFQSMNG : 566  
C.elegans : -----SEPIGRPASPKAILQKAETDPKELQRI : 581

A.thaliana : LPKEHLPTPSQWDVCEQIDDDVDRERNFGLFECVSVEALTRICSNSSKISG : 1462  
H.sapiens : NFFQSVPECEHHQKDKELSFSEVEELFLQTTFDKMDFLTIVRECGIEK : 673  
S.cerevisiae : ISSADRIFEWLKSKWNQLRGTDAKQDQFCNFISWLGNKYDPENPFNDKK : 615  
C.elegans : VLAVDVLGEFYFSRGALQIRIMQYVADYYLTADNVEIRLAAVSSCCEMVV : 630

A.thaliana : CQVPDVVQLPLVLRDPLLHDMDIYFLSIIPEVK-EKGPLSDIFMGCALL : 1510  
H.sapiens : HQSSIGFSVHQNLKESLDRCLLGLSEQLLNYSSEITNSETLVRCRLL : 722  
S.cerevisiae : GEGANPVSLSCWDESHKIWHFQEQREFLLGVKPEEKSECFNTPFNLPK : 664  
C.elegans : PFVGVYKQVTSDKRNSLLQTIYGVLRVCSVIVN-DQDVRVRMQVISCF : 678

A.thaliana : CHFMHGSYITRKGGSSSFFLKAACOYLLEGLDHAVESVSKSLNDLQRRG : 1559  
H.sapiens : VGVLCYCYMGVIAEEEEAYKSELFQKANSMLQCAGESITLTKNKTNEEF : 771  
S.cerevisiae : VSLDLTRYNEILYRLLENIESDAFSSPLQKFTWVAKLIQIVDNLCGDST : 713  
C.elegans : GQMPRPFLAHLAQPEMLEVQFMALHDEKLEMQQACVTLGRLAELNPAL : 727

A.thaliana : SLGFGSDFNEKGSIIIVSLRSFTQSPVFSNRRDQNLGASYDFVIHSLN : 1608  
H.sapiens : RIGSLRNMMQLCTRCLSNCTKKSPNKIASGFFLRLLTSKLMNDIADICK : 820  
S.cerevisiae : FSEFIAAYKRTTLITIPQLSFDSONSYQSFFEEVLSIRTINVDHLVLDK : 762  
C.elegans : VLPRLRLMLLETLSQMQQSGQARLEQHSKAMIAQLAKQSPKFMRPYVGS : 776

A.thaliana : LLRSFAKVYEEYTEHAWNTHSDT-----VPSKSLAPDSPEVGR--IVD : 1649  
H.sapiens : SLASFILKKPFDRGEVESMEDDTNGNLMEVEDQSSMNLFNNDYPDSSVSDA : 869  
S.cerevisiae : INMKEIVNDFIRMQKNKSQTGTSAINYFEASSEDTTQNNSPYTIGGRFQ : 811  
C.elegans : LMIAMIPKLRNDQKYAEVTAQVLNAVSEIAVIGGAEIVKNLKLPLFEKLT : 825

A.thaliana : MDL~~DLA~~EDTKER~~DI~~IAAGGKAVPGLPVS~~MGN~~NW~~KL~~GMVSLISCFSPV~~IQ~~F : 1698  
H.sapiens : NEPGESQSTIGAINPLAEEYLSKQDLLFLDMLKFLCLCVTTAQTNTVSF : 918  
S.cerevisiae : KPLHSTIDKAVRAYLWSSRNK~~S~~ISER-LVAILEFSDCVSTDV~~F~~ISY~~I~~GT : 859  
C.elegans : HMINDSSSLHK~~REA~~ALRAIGGICRSTAYVVD~~P~~YRDYPSLLD~~DL~~LRI~~IK~~T : 874

A.thaliana : PTWDVLYN~~LL~~E~~K~~ESDPK~~V~~LENILY~~HI~~CKLSCLTSIPKVDDLVI~~F~~LDGML : 1747  
H.sapiens : RAADIRKLLMLIDSSTLEPTKSL~~HI~~HMYLMLL~~K~~ELPGEEYPLPMEDVL : 967  
S.cerevisiae : VCQWLKQAIGEKSSYNKILEEFTEVL~~G~~EKLLCNHYSSSNQAMLL~~L~~TSYI : 908  
C.elegans : VMSNTMRREAI~~K~~TLGILGAIDPYTH~~K~~VFTGVSQSS~~T~~AISTALS~~L~~PISET : 923

A.thaliana : STQVKMKRNC~~LN~~I~~V~~TALH~~V~~LLHTLSSSRDSSGVEKNCGL~~S~~LKEAESFQ : 1796  
H.sapiens : ELLK~~P~~LSNVCSLYRRDQDVCKTILNHV~~L~~HVVKNL~~G~~QSNMDS~~E~~NTRDAQG : 1016  
S.cerevisiae : EAIRPQWLSY~~P~~EQPLNSDCN----- : 928  
C.elegans : DSKD~~P~~RQD----- : 931

A.thaliana : VFVQLGAMVNKVSEFGL~~L~~GWFG~~R~~VK~~I~~INCICDLVLLNPQTGQTMIER-- : 1843  
H.sapiens : QFLT~~V~~IGAFWHLTKERKYIFSV~~R~~MA~~V~~NCLKTLL~~E~~ADPYSK~~W~~AILNV~~M~~G : 1065  
S.cerevisiae : --DILDWII~~S~~RFEDNSFTGV~~A~~PTV~~N~~L~~S~~MLLS~~L~~LQNH~~D~~LSHGSIRGG-- : 973  
C.elegans : -----I~~I~~HWFNYEKCTLEEFYPAITIANLMLMMQDEDSQS~~Y~~AEIAQA-- : 973

A.thaliana : -----LLMLSDSDYRVRFVLARQ~~I~~GILFQ~~T~~WDG-----HEA : 1875  
H.sapiens : KDFPVNEVFTQFLADNHHQVRMLAAESIN~~R~~L~~F~~QDTKGDSSRLLKALPLK : 1114  
S.cerevisiae : -----KQRVFATFIKCLQKLDSSN~~I~~INIMNSISS-----Y : 1003  
C.elegans : -----IVTIFRSLGDMAPLYTEQV~~I~~PR~~I~~IEVCRR-----AT : 1004

A.thaliana : LFQ~~D~~ICSSFGIKLVTS~~S~~KEKLV~~T~~AKDVLAVG~~P~~QPRQKMETV~~I~~ITL~~M~~HLA : 1924  
H.sapiens : LQQTAFENAYLKAQEGMREMSHSAENP-ETLDEIYNRKS~~V~~LLT~~L~~IAVVL : 1162  
S.cerevisiae : MAQ~~V~~SYKNQSIIF~~Y~~EIKSLFGPPQOSIEKSAFYSLAMS~~L~~SLVSYPSLV : 1052  
C.elegans : ESSNRANLREFFLQQLANFVAI~~R~~KHAAPYMPAIFTI~~I~~ADAWKEDISVK : 1053

A.thaliana : YHSENI~~E~~LQAV~~E~~MMCAVSAKDP~~C~~QRELI~~I~~AA~~L~~DNLSAQLHY~~P~~SRFKYLE : 1973  
H.sapiens : SCSPICEKQAL~~E~~ALCKSVKENGLEPHLVK~~K~~VLEK~~V~~SETFGYRRLEDFMA : 1211  
S.cerevisiae : FSLEDMMTYS~~G~~EN-----HTRAFIQQA~~I~~NKITVAFRYQNLTE~~L~~FE : 1092  
C.elegans : MVVIEVLTDMG-----TAIGNDFSKYT : 1075

A.thaliana : ELIGPILFHWIASGVSLAGLIETSQLFIPNAEPKYFIHFCSHWLLPALL : 2022  
H.sapiens : SHLDYLVLEWLNLDTEYNLSSFPFILLNYTNIEDFYRSCYKVLIPHLV : 1260  
S.cerevisiae : YCKFDLIMYWVFNRTKVPTSKLEKEWDISLFGFADIHEFLGRYFVEISAI : 1141  
C.elegans : GELIPYLLTVLQTDKTKERVLTVKVMESIQLKTHCIVQHLHLVLPPLLI : 1124

A.thaliana : LHEDHTNLDWVAKMAGQPVVVLVKENFVPIFS-----ICMGLHCSKTS : 2065  
H.sapiens : IRSHFDEVKSIANQIQEDWKSLLTDCFPKILVNILPYFAYEGTRDSGMA : 1309  
S.cerevisiae : YFSQGFNQKWLDMMLHAITGNGDAYLVDNSYY-----LCIPLAFISGG : 1184  
C.elegans : ILDDFSLKLSIRNTALSTVLHMTQQVDVSAYAP-----RMMQSW : 1163

A.thaliana : ECDKGAMVLQNSILYVGETSENERDKLIKQNMVSIVSFILS-----CA : 2108  
H.sapiens : QQRETATKVYDMLKSENLLG-KQIDHLFISNLP EIVVELLMTLHEPANS : 1357  
S.cerevisiae : ----VNELIFDILPQISGKTTVKYHKKYRLLMLKWIIRFTDLG-----S : 1224  
C.elegans : HHNISTAEMRDKLLLLLIEIKQLGKFFDIFKRGVDQKLRDYN----- : 1206

A.thaliana : SSSPEPPVPTFS-----RDTISLAVQTVVDGFLENTD-YPKNAAITDR : 2150  
H.sapiens : SASQSTDLCDFSGDLDPAPNPPHFP SHVIKATFAYISNCHKTKLKSILE : 1406  
S.cerevisiae : LTELSTVEKLFPTS YLSPYLFENSSVSMRYQYPLHIPALGATLVQQTQ : 1273  
C.elegans : -LDKSVHYEQYRKL AQR A QMSRDVLTSSVFAGSNGNIQYSSTQAGMRGQ : 1254

A.thaliana : INIFRPDRVFMFITEMHYRMSAAC--HHRHTRHHLAAEELTILLGHRA : 2197  
H.sapiens : ILSKSPDSYQKILLAICEQAAETNNVYKKHRILKIYHLFVSLLLKDIKS : 1455  
S.cerevisiae : FAHEKNNTHEFKLFLFSVITDLEKTSTYIGKLR CARELKYLFVLYENVL : 1322  
C.elegans : ANNVYANNDLHERLMNGSIDSGASRQDNRDDYRYGVEEKKEVPKVAPT : 1303

A.thaliana : LVPSSLNYIFNLVGQFIGYPS-----LQDQCCSIASCLLDLDFKSN : 2237  
H.sapiens : GLGGAWAFVLRDVIYTLIHYINQRPSCIMDVSLRSFSLCCDLLSQVCQT : 1504  
S.cerevisiae : VKSSTLNFIIIRLSKFLIDTQ-----IHDEVITIFSSLLNLADKN : 1362  
C.elegans : TARPTSELVTVQITKQRLNKD-----ALMPQWKNE : 1333

A.thaliana : PAKEIVSVLGDQLQFLVSKIVTCCIDAEADTKISGAKSSQLVNLLHKLKLV : 2286  
H.sapiens : AVTYCKDALENHLHVIVGTIIPLVYEQVEVQKQVLDLLKYLVID----- : 1548  
S.cerevisiae : TFEIEPSLPNLFCKIFITYLR----- : 1382  
C.elegans : NLTSKDEWLQWLMKIRIGFLTYGSSP----- : 1359

A.thaliana : VSSDSSINEDIRDLEPLPDLKYFQVIRESHIRICEAYS PRNHLLKVEHS : 2335  
H.sapiens : NKDNENLYITIKLLDPFPDHVVFVKDLRITQQKIKYSRGPFSLLEEINH- : 1596  
S.cerevisiae : --ENKQLSPSFQQAIKLEHRDLIKIKTWKYFLDAIFG----- : 1418  
C.elegans : ----- : -

A.thaliana : TFLIYIFLEILSLSNFLFLSCSTIQQC SRRSNYLPPRFLSRSLOALHNK : 2384  
H.sapiens : -----FLSVSVYDALPLTRLEGLKDIRRQ : 1620  
S.cerevisiae : -----NIVQDDIYENTELLDASDCGVD : 1440  
C.elegans : -----SLRAASSLGDQHPHLARDIFPA : 1381

A.thaliana : LIASEVSQE---DTNGETAETFWQSDDEIVNAVWTLVRSAS-DEADSM : 2429  
H.sapiens : LELHKDQMVDIMRASQDNPDGIMVK--LVVNLQLSKMAINHTGEKEV : 1667  
S.cerevisiae : DVVLVSLFYSYARRPVASKIGCSLSKAAAINILKHHVPKEYLSKNFKLW : 1489  
C.elegans : AFMSVWTELDSDVQNDLTSCLLRAISTGIPELIQTILNLAEFMDHSEK : 1430

A.thaliana : RLLVSDFLSRIGIRDPHTVVFHLPGNLVS MHGLQGFHNTGSKVRSLTE : 2478  
H.sapiens : LEAVGSCLEGEVGPIDFSTIAIQHS-----KDASYTKALKLF : 1703  
S.cerevisiae : FAALSRRILQQEVQRERSTNFENNE-----VHLKNFEMVFRH : 1525  
C.elegans : PLPISHDVLGRWAEQTKAFKACR-----YKEMSVLKKSGSMQ : 1468

A.thaliana : NGISDETLITLLNFLKKYLLD DSVKIIDVTSQTLRGILSTERGQQALSS : 2527  
H.sapiens : EDKELQWTFIMLTYLNNTLVEDCVKVRSAAVTCLKNILATKTGHSFWEI : 1752  
S.cerevisiae : PEQPHMIYQRISTFNKEAELYDSTEVFFISECILTYLVGYSIGNSESEF : 1574  
C.elegans : TTFRKVKLEPNDCQSLITYANKLN VQEEAAGVVRYAERNEMNFQMRGR : 1517

A.thaliana : FDSCERALIEVHGRGVNLDIVEKIL LDSQKQFKAEKFS-LETPEVWSTD : 2575  
H.sapiens : YKMTTDPMLAYLQP---FRTSRKKFLEVPRFDKENPFEGLDINLWIPL : 1798  
S.cerevisiae : CFRDN---IMNENKDKVAPLDKDV LNAIYPLANNFGMESFICDTYLSV : 1619  
C.elegans : WYEKLNEWEKALGAYELEEKKKSSCPNLQVYDEKDHLMTPEEAATAEEA : 1566

A.thaliana : NKNFDRWICQLVYCMIAL--CEDVPIRLCQNIALLKAEISELFPVSVV : 2622  
H.sapiens : SENHDIWIKTLTCAFLDSGGTKCEILQLLKPMCEVKTDFCQTVLPYLIH : 1847  
S.cerevisiae : NEPYNCWLSKFARSLIHQISFNIPPIVCLYPLCKGSTAFCELVLTDLFF : 1668  
C.elegans : RMHEMRCLEALGRWDELNSKSVVWADQ RGNRNSVRDEINKKQLDHKMA : 1615



A.thaliana : SLAGRIG-MDINLHDLITSQVKEHIFTDSNKLTKSKQVMLNTLNELRMC : 2670  
H.sapiens : DILLQD--TNESWRNLLSTHVQGFFTSCLRHFSQTSRSTTPANLDSESE : 1894  
S.cerevisiae : LSTTYDPKSCLNWSNRIFTQIAMLLHVKDSEIKLKMLFNVIKIRMGRS : 1717  
C.elegans : VIAARGAWAVDNWERMADYVSVISENTQDGAMLRVAVVHNDEN----- : 1659

A.thaliana : YVLERSIFSGQTKREKNSRSCSTAAKIRDVESGSNGMAASITTNWEKVV : 2719  
H.sapiens : HFFRCCLD-----KKSQRTMLAVVDYMRQKRPSGTFIFNDAF : 1932  
S.cerevisiae : CKERNCLR-----IYSSLDLQEQICQISLKIKEFKFGYLLFHEMN : 1756  
C.elegans : -----TKAMGLIEKVREMIIDSELTAMANESYERAY : 1689

A.thaliana : WLSIDYLVVAGSAVVCAYLTASMYVEYWCEEKFGNLSLGDPD--FSYH : 2766  
H.sapiens : WLDLNYLEVAKVAQSCAAHFTALLYAEIYADKKSMDDE-----K : 1972  
S.cerevisiae : MPNIREMNINTLQKIYECINDGDFLAGLPVPHSIEGVLNSINRIDSSTW : 1805  
C.elegans : IPMVSVQQMAELEEAIEY----- : 1707

A.thaliana : DKLPDHVEILVSAITRINEPDSLYGVTHSNKLSAQIITFEHEGNWTRAL : 2815  
H.sapiens : RSLAFEEGSQSTTISSLSKSKKEETGISLQDLLLEIYRSIGEPDSLYGC : 2021  
S.cerevisiae : KRFLFNADFDANYTTSLEEEKESLIKATEDSGFYGLTSLLESRLSGSS : 1854  
C.elegans : KTRPERRPRIALLWSRRLQGCRRNVEQWQRLIMLRGLVLSPOEMHPLRV : 1756

A.thaliana : EYIDLQARSQKMOVVPSLSENLEVEQFQPTTSARHSVFGEGEVQRQPFK : 2864  
H.sapiens : GGGKMLQPITRLRTEHEAMWG-----KALVTYDLETAPSSSTRQA : 2062  
S.cerevisiae : DVYKWNLELGDWKLTPKVVD-----KAKGLYYAIKNLPQDV : 1892  
C.elegans : KFSSMCRKQGKNS-----MSRAVLRELLSLPANS : 1785

A.thaliana : GLIRSLQQTGCMHVLDLYCRGLTSREGCFQYDPEFIELQYEAAWRAGKW : 2913  
H.sapiens : GIIQALQNLGLCHILSVYLKGLDYEN--KDWCPLEELHYQAARNMQW : 2109  
S.cerevisiae : GFAKSLEKSLTIFDSRQHFISQTEWMDTLNAIIEFIKIA----- : 1933  
C.elegans : DLVRAKAPFDKPLLVLALAKQIYQDDHKDEAIRALEDLANHWN----- : 1828

A.thaliana : DFSLLYPQTHCQPLQHAKNNNYHESLHCCLRALQEGDYDGFYGKLKDTK : 2962  
H.sapiens : DHCTSUSKEVEGT-----SYHESLYNALQSLRDREFSTFYESLKYAR : 2151  
S.cerevisiae : ----- : -  
C.elegans : -----KR : 1830

A.thaliana : KELVLSISRASEESTEFIYSTVVKLQILHHGLVWDLRWTSSSHQSVHG : 3011  
H.sapiens : VKEVEEMCKRSLESVYSLYPTLSRIQAIGELLESIGELFSRSVTHRQLSE : 2200  
S.cerevisiae : -AIPQDVTSTFPQTLMSIMKADKERLNTIDFYDHKTTLKSRHTLMNVLSR : 1981  
C.elegans : INPIPKATGRELIPSTKEPARICAKVLLKLGWTELKSKTSNNMQVGE : 1879

A.thaliana : YLVKQMACVDPVIPTMDQLSWLNKDWNSIITQTQLHMTLLEPFIAFRRV : 3060  
H.sapiens : VYIK-----WQKHSQLLKSDSDFSFOEPIMAIRTVILEILMEKEMD : 2240  
S.cerevisiae : NSLDEN-----VKCSKYLRLGSI IQLANYVQLAIANGAPQDALRNA : 2022  
C.elegans : LSFVR-----QQVSPQYRTKESRTPETIAFENTINYQQATQYD : 1918

A.thaliana : LLQILGCEKCTMQHLLQSASLLRKGTRFSHAAASLHEFKFLCAR----S : 3105  
H.sapiens : NSQRECIKDILTKHLVELSILARTFKNTQLPERAIFQIKQYNSVSCGVS : 2289  
S.cerevisiae : TLMKSTVKNIKLYDDPSVVSQIEKLASFTSANALWESREYKAP----- : 2066  
C.elegans : PGWHKVVHKLASTHFYAVCRERPHPTTVVISPPQPPQPPKMKHIP----- : 1962

A.thaliana : NGQ-QPVPDWLGKLEEAKLLHAQGRHEVSIISLANYILHNYQ-LKEEASD : 3152  
H.sapiens : EWQLEEAQVFWAKKEQSLALSILKQMIKKLDAS--CAANNPSLKLTYTE : 2336  
S.cerevisiae : -----VMIMRDLLAQNEKNISESILYDDFKLLINVPMDQ : 2100  
C.elegans : -----PVTRATSPPPPAQKSPQAPFHSITEPLSVIIDYPVPP : 2000

A.thaliana : IYRVIGKWLAEETRSSNSRTILEKYLRPAVSLAEEQSSKICKRLVDRQSQ : 3201  
H.sapiens : CLRVCGNWLAETCLENPAVIMQTYLEKAVEVAGNYDGESSDELNRNGMK : 2385  
S.cerevisiae : IKARLVKWSSESRLEPAAAIYEKIIVNWVINVEDHES-----CSD : 2140  
C.elegans : PLGSLVGLPPMPAYLSSNSSLPPQHVVSPVLSNDSPSNS-AENKLYLKH : 2048

A.thaliana : TWFHIAHYADALFKSYEERLSSSEWQAALRLRKHKTKLELVFIKRFKSS : 3250  
H.sapiens : AFLSLARFSDTQYQRIENYMKSSSEFENKQALLKRAKEEVGLLREHKIQT : 2434  
S.cerevisiae : VFYTLGSLDEQAQKLRNNGEIEDREHRSYTGKSTLKALELIYKNTKLP : 2189  
C.elegans : AAHAVRCFAKALMCSPGSRLEDTLRLMQLWFDHGDDKDQDVYFALTETI : 2097

A.thaliana : KKAEQSDYSLKIQDLQKQITMDKEEAELQVDRDNFKLALLEGYKRCLE : 3299  
H.sapiens : NR-----YTVKVQRELELDELALRALKEDRKRFLCKAVENYINCLL : 2475  
S.cerevisiae : EN-ERKDAKRHYNRVLLQYNRDESEVLKALLLQKEKFLWHALHFYLNLTIV : 2237  
C.elegans : FDLPVTTWLEAIPQLMARLDCPDD-----QKSVQLVLRVLCEIARHRP : 2140

A.thaliana : IGDKYDVRVVF~~FRQVSMWFSLASQKNVIDNMLSTI~~KEVQSYKFIPLVYQI : 3348  
H.sapiens : SGEE-HDMWVFR~~LCSLWLENSGVSEVNGMMKRDGMKIPTYKFLPLMYQL~~ : 2523  
S.cerevisiae : FSNRYDNDI~~IDKFCGLWFENDDNSKINQLLYKEIGTIPSWKFLPWNQI~~ : 2286  
C.elegans : QAVIYALTVAS~~R~~SKDVHRSKNAGTVLEK~~MM~~EYH~~SKLVREASLVTEELVR~~ : 2189

A.thaliana : ASRLGSSKDESGSNS~~FQ~~SALVSLIRKMAID~~HPYHTILQLLALANGDRIK~~ : 3397  
H.sapiens : AARMG--TKMMGGLG~~FHEVLNNLISRISM~~DHPHHTLF~~IILALANANRDE~~ : 2570  
S.cerevisiae : ASKIS-----MEENE~~FQKPLQLTMKRLLYKLPYDSL~~YSVMSILLYEKQS : 2330  
C.elegans : CAILWH---EQWHDALDDASRVYF~~HRR~~LQ~~D~~NNVQAMFDAL~~RNMNDLMQK~~ : 2235

A.thaliana : -----DNQ~~RSRNSFVVDMDKKLAAE~~HLLQDVSHYHGPMIRQ : 3433  
H.sapiens : FLTKPEVARRSRITKNV~~PKQSSQLDEDRTEAANRIICTIRSR~~RPQM~~VRS~~ : 2619  
S.cerevisiae : -----NKDTNI~~SQKIQAVKKILL~~ELQGYDRGAF~~AKKYLLP~~ : 2365  
C.elegans : G-----APT~~TMKEHSFQQTYS~~SDLKE~~AGRYVQAFESSGNV~~KD : 2272

A.thaliana : MKQLVDIYIK~~LAELETRREDTNRK-VALPREIRSVKQLELVPVVTATIP~~ : 3481  
H.sapiens : VEALCDAYII~~LANLDATQWKTQRKGINIPADQPITKLNLEDV~~VVPTME : 2668  
S.cerevisiae : VQEFCEMSV~~ELANLKFVQNTKTLRLANLKI~~GQYWLKQLN~~MEKLP~~PTS~~N~~ : 2414  
C.elegans : LNQAW~~EIYCSVFKLRDQLATLNSLDLVYVSPNLVSAKDLEL~~VVPGTYD : 2321

A.thaliana : VDRSCQYN-EGS~~FPPFRGLSDSVTVMN-GINAPKVVECFGSDGQKYKQL~~ : 3528  
H.sapiens : IKVDHTGE-YGNLVT~~IQSFKA~~EFRLAG-GVNL~~PKIIDCVGSDGKER~~RQL : 2715  
S.cerevisiae : FTVKSSADGRKARPY~~IVSVNETVGITTTGLSLPKIVTFN~~ISD~~GTTQKAL~~ : 2463  
C.elegans : PSAP-----IVS~~IQSFSSKMN~~VIT-SKQ~~RPRKMVIRGSNGLDYQFL~~ : 2361

A.thaliana : AKSGNDDLRQDAVME~~QFFGLVNTFLHNNRDTWKRRLLAVRTYKVI~~PFTPS : 3577  
H.sapiens : VK-GRDDL~~RQDAVMQV~~FQMCNTLLQ~~RNTE~~TRKR~~KLTICTYKVVPL~~SQR : 2763  
S.cerevisiae : MKGSNDDLRQDA~~IMEQVFQV~~NKVLQ~~NDKVL~~RNL~~DLGIRTYKVVPL~~GPK : 2512  
C.elegans : LK-GHED~~PRQDERVMQLFGLVNTLLANNSETCRNLT~~IQRYSI~~VALS~~SKD : 2409

A.thaliana : AGVLEWVDGTIPLGDY~~LIGSSRSEGAHGRYGIGNWKYPKCREHMSSAK-~~ : 3625  
H.sapiens : SGVLEWCTGTVP~~IGEF~~LVNN--EDGAH~~KRYRPNDFSAFQCQK~~KMMEVQK : 2810  
S.cerevisiae : AGIIEFVANSTS~~LHQI~~L~~SKL-----HTNDKITFDQARKGMKAVQT~~ : 2552  
C.elegans : SGLIGWV~~PNCDTLHTLV~~KEYR-E~~KKAKIPLSIEHKT~~LQKLSLETEH~~LTL~~ : 2457

A.thaliana : ----DKRKAFVDVCTNFRPVMHYFFLEKFLQPADWFKRLAYTRSVAAAS : 3670  
H.sapiens : KSFEELYEVFMDVCQNFQPVFRYFCMEKFLDPAIWFEKRLAYTRSVATS : 2859  
S.cerevisiae : KSNEERLKAYLKITNEIKPQLRNFFFDSFPDPLDWFEAKKTYTKGVAAS : 2601  
C.elegans : MQKLQLFESALSVTQG--EDLRHVLWLKSPSSEVWFDRRTNYTRSVACM : 2504

A.thaliana : SMVGYIVGLGDRHAMNIIIDQATAEVVHIDIGVAFEQGLMLK-TPERVP : 3718  
H.sapiens : SIVGYIILGLGDRHVQNILINEQSAELVHIDIGVAFEQGLMLK-TPETVP : 2907  
S.cerevisiae : SIVGYIILGLGDRHLNIIIDCSITGEPHIDIGIAFDQGLLP-IPELVP : 2649  
C.elegans : SMVGYIILGLGDRHPSNLMMLDRLTGKVVHIDIFGDCFEVAMLRKFPERP : 2553

A.thaliana : FRLTRDIIDGMGITGVEGVFRRCCETLSVMRTNKEALLTIVEVFIHDP : 3767  
H.sapiens : FRLTRDIVDGMGITGVEGVFRRCCETLMEVMRNSQETLLTIVEVLLYDP : 2956  
S.cerevisiae : FRLTRDIVDGFVGTGVDGLFRRSCERVYAVLRKDYVKVMCVLNILKWDP : 2698  
C.elegans : FRLTRMLINAMEVTGLDGVYNYTAERVLKMLRTNQESLLAVLEAFVYDP : 2602

A.thaliana : LYKWALSPLKALQRQK---ETEDYDGMNLEGLQEEFEG-----NKD : 3805  
H.sapiens : LFDWTMNPALKALYLQQRPEDETELHPTLNADDQECKRNLSDIDQSFQKV : 3005  
S.cerevisiae : LYSWVMSPVKKYEHLF---EEEHEITNFNVSKFISNN-----DRN : 2736  
C.elegans : VINWRLVEGMKKDPKTRKDTGGRQNMAGAVLPSSTTDS-----IMETI : 2646

A.thaliana : ATRALMRVKQKLDGYEGGEMRSIHGQAQQLIQDAIDTDRLSHMFPGWGA : 3854  
H.sapiens : AERVLMLRQEKLGVEEGTVLSVGGQVNLIIQQAIDPKNLSRLFPGWKA : 3054  
S.cerevisiae : ENQESYRALKGVEEKLMGNLSVSSVQDLIQQATDPSNLSVIYMGWSP : 2785  
C.elegans : KRKLDGTEFVHTDGGSTPPEPLQVTEQLAMLTQATSPLNLCQSYIGWCP : 2695

A.thaliana : WM : 3856  
H.sapiens : WV : 3056  
S.cerevisiae : FY : 2787  
C.elegans : FW : 2697
