# Supplementary material
Source: PubMed Central journal article supplement (PMC1369146)
Supplement: 6-7400479-s3.pdf [file 6-7400479-s3.pdf]

**Supplementary Fig S3** | Sequence alignment of orthologs of human ATR (gi 4502325), *A. thaliana* (gi 18422029), *S. cerevisiae* (gi 1582522), and *C. elegans* (gi 7507297). Sequences were aligned using ClustalX.

```

A.thaliana : MAKDDNNLSSIVHELRRERVAASASTPANNLRHSSGDEDALEIRFRAVIP : 49
H.sapiens : MGEHGLELASMIPALRELGSATPEEYNTVVQKPRQILCQFIDRILTVDN : 49
S.cerevisiae : MESHVKYLDELILAIKDLNSG----VDSKVQIKKVPTDPSSSQEYAKSL : 45
C.elegans : -MNIDKDVSAI LCTAKKYVTQKEFNRQMKFLLDDITKLLSKSFVSRIE : 48

A.thaliana : NLLNTYVVP SLGNGREVTAVL KLVGHTARNIPGVFYHGTPSAILP---- : 94
H.sapiens : -VVAVELVKKTDSQPTSVMLLDFIQHIMKSSPLMFVNVSGSHERKGCSCI : 97
S.cerevisiae : KILNTLIRNLKDQRRNNIMKNDTIFSKTVSALALLLEYN----- : 84
C.elegans : QLDENEFMEKIMILQSITFTLHLITEKQELSSEEKIRLFQSVIASMCAF : 97

A.thaliana : -----VIARIIPFFAEPEFVPGHGVLLETVGSILMLLRSNSRKAYRI : 136
H.sapiens : EFS--NWIITRLLRIAATPSCHLLHKKICEVICSLFLFKSKSPAIFGV : 144
S.cerevisiae : -----PFLVMKDSNG---- : 95
C.elegans : EDEELAKCFDRILSVLMI SVTKQDPRETIYFLQGLLEVVKYCDVEPSSS : 146

A.thaliana : FFHDALQAIQDMQPIAS-LHSIEPEVCESHIPFR----CFCMSFSGIGG : 180
H.sapiens : LTKELLQLFEDLVYL--HRRNVMGHAVEWPVMS----RFLSQLDEHMG : 187
S.cerevisiae : -NFEIQRLIDDFLNI SVLNVDNYHRIWFMRRKLG----SWCKACVEFYG : 139
C.elegans : LPQLITPEIASAISLGASGFFRYHLKWNIIISTLFGENAGECVHFDELVL : 195

A.thaliana : DLPDANKPRDGDGLVNLNLLGANRWQPFATCIKCLICKCLTEGTLVVOGL : 229
H.sapiens : YLQSAP-----LQLMSMQNLEFIEVTLMLVLTRIIAIVFFRQ-- : 225
S.cerevisiae : -----KPAKFQLTAHFENTMNLYEQAL : 161
C.elegans : FWPHCR-----SQLEDKLNDCSMTENCIRAGLTILKYKKLHNSIL : 236

A.thaliana : IHTSFFKAACSLVCCGGADVQMACFEFATLVGSILTFNILPHVALIQSI : 278
H.sapiens : -ELLLWQIGCVLLEYGSPKIKSLAISFELTELFQLGGLPAQPASTFFSSF : 273
S.cerevisiae : TEVLLGKTELLKFYDTLKGlyILLYWETSEYSTFG-----NSIAFLDSS : 205
C.elegans : DQALFIDELFATFNSLTAKKSTNHMTF PKLLNEIQHF LQDHGKVLIMHK : 285

A.thaliana : ILLLSADEGLPVYRNTIYDS-----TIGRFLTAVYSSCSDAAVKLTAES : 322
H.sapiens : LELLKHLVEMDTDQLKLYEE-----PLSKLIKTLFPFEAEAYRNIEPVY : 317
S.cerevisiae : LGFTKFDNFQRLIR-----IVLYVFDSCELA ALEYAEIQKY : 243
C.elegans : ELRQKPVQWLI IYLELIDDANDKFGLLENFSLLLLDLSTNHDIHEFPAR : 334

```

A.thaliana : I V L V L S ----- H A L Q R T K S E E L K A S L C S A Y V R I V K S C P P C I W K I H C : 363  
H.sapiens : I N M L L E K L C V M F E D G V L M R L K S D L I K A A L C H L L Q Y F L K F V P - A G Y E S A L : 365  
S.cerevisiae : I S L V V D ----- Y V C N R T I S T A L D A P A L V C C E Q L K F V L T ----- : 276  
C.elegans : I C M T A S ----- E I C M R R I K H S I Q S T H T D C L A D Y L D I L A ----- : 367

A.thaliana : L L E L L H L P E P C F Q L I E C F --- K A V L I V L G P G C V R V E T T K C G S H T S A T S D : 409  
H.sapiens : Q V R K V Y V R N I C K A L L D V L G I E V D A E Y L L G P L Y A A L K M E S M E I I E E I Q C Q : 414  
S.cerevisiae : -- T M H H F L D N K Y G L L D N D P T M A K G I L R L Y S L C I S N D F S K C F V D H F P I D Q : 323  
C.elegans : - S L L K L A R I Q K L D I F Q C F A T E I E A H H S L N N P L W P R I L R S L L S V Q N P H C Q : 415

A.thaliana : R P V Q G I N A G K K R H I E D E S T Y K R K R Q K V G D D I R R G V Y F A P E F A D E T D G K D : 458  
H.sapiens : T Q Q E N L S S N ----- S D G I S P K R R L S S S L N P S K R A P K Q T E E I K H V D M N Q : 458  
S.cerevisiae : W A D F S Q S E H ----- F P F T Q L T N K A L S I V Y F D L K R R S L P V E A L K Y D N : 364  
C.elegans : Q F C K K F V P S -- I D K L W I T L L N G E S S R A T L N S L V I V T A S C P F A N N N D E G V : 462

A.thaliana : A A S L R E M L I S T V E S L K P ----- P P A G P S L S Q T E S S I V A L S M L T N A F C F C : 502  
H.sapiens : K S I L W S A L K Q K A E S L Q I S L E Y S G L K N P V I E M L E G I A V V L Q L T A L C T V H C : 507  
S.cerevisiae : K F N I W V Y Q S E P D S S L K N ----- : 381  
C.elegans : K Q I I P F L L I P C F Q D F R D R ----- V G S K W D N F R F I G L P K S E P S E L I N L E : 505

A.thaliana : P W T D M T H R L F N Q M Y A W I P W I A G Q V E E T N P I M F D I S I Y L E G I H N L L L V G - : 550  
H.sapiens : S H Q N M N C R T F K D C Q H K S K K K P S V V I T W M S L D F Y T K V L K S C R S L L E S V Q K : 556  
S.cerevisiae : ---- V T S P E D D R Y K Q L E K L R L L V L K K F N K T E R G T L L K Y R V N Q L S P G F F : 425  
C.elegans : R F T T V L E R S T S E S T K L R A V N C A L Q L E K K T G K Y I N L V A E M S L A V F S K S Q T : 554

A.thaliana : V D P Q Y E Y T S K G N D L V A I Q F L L K L P W T H Y M L F K T P S S L V K S K C L S V G I W T : 599  
H.sapiens : L D L E A T I D K V V K I Y D A L I Y M Q V N S S F E D H I L E D L C G M L S L P W I Y S H S D D : 605  
S.cerevisiae : Q R A G N D F K L I L N E A S V S I Q T C F K T N N I T R L T S W T V I L G R L A C L E S E K F S : 474  
C.elegans : D R I A N S F E P L I L F L T D N L Q L I N D F I T I L I A K L C E K Q E F Y S E L T I L K Y F K : 603

A.thaliana : K L G L Q D G S D F D I F S W S L S D D F E Q V Q A V A A I S M P L K V L F S G L G A L L H M F P : 648  
H.sapiens : G C L K L T T F A A N L L T L S C R I S D S Y S P Q A Q S R C V F L L T L F P R R I F L E W R T A : 654  
S.cerevisiae : G T L P N S T K D M D N W Y V C H L C D I E K T G N P F V R I N P N R P E A A G K - S E I F R I L : 522  
C.elegans : T L Q K L F C L A A N G R N S C K K C G E E C F V D P D S K E N V K I D Y E S L S G L I K G I V A : 652

A.thaliana : KLEHLLEEKELMIKKAIPQSLGFLSCLYGSSTTDSEKTACHLLLHEDLK : 697  
H.sapiens : VYNWALQSSHEVIRASCVSGFFILLQQQNSCNRVPKILIDKVKDDSDIV : 703  
S.cerevisiae : HSNFLSHPNIDEFSESLLSGILFSLHRIFSHFQPPKLTGNGQINKSFK : 571  
C.elegans : RRNTFSQELIREFLQTSRVMLLHVDSKGIASSFTSITKALDIGFSEAN : 701

A.thaliana : KDETLNSLLQGFRCSKCDKFIEREDEKHFRIETPEMVKLKMDHHRDYF : 746  
H.sapiens : KKEFASILGQLVCTLHGMFYLTSSLTEPFSEHGHVDLFCRNLKATSQHE : 752  
S.cerevisiae : -----LVQKCFMNSNRYLRLLSTRIIPLFNISDSHNSSEDE : 606  
C.elegans : ----AYFRVWELVCCRSEATVEKKLQMYIPLIGRSFALLGDDAALKVHG : 746

A.thaliana : NLQS-----LYFNLLYDESSEETQLACVEVIRRILGHTSPDILVRT : 787  
H.sapiens : CSSSQLKASVCKPFLFLKKKIPSPVKLAFIDNLHHLCKHLDFREDET : 801  
S.cerevisiae : HTAT-----LIKFLQSQKLPVVKENLVIAWTQLTLTTSNDV : 642  
C.elegans : FLSN-----VLSARLSSTVKATLFASSFAHSVLKNCIDWNVSYTW : 787

A.thaliana : RSQWIRCLQYLLV-HVNTDVREAFCAQIGIFVQHP-----IVSCLF : 827  
H.sapiens : VKAVLGTLLNLME-DPDKDVRVAFSGNIKHILESLDSEDFIKELFVLR : 849  
S.cerevisiae : FDTLLKLLIDIFN-SDDYSLRIMMTLQIKNMAKILK----- : 677  
C.elegans : KTQFSQCLIKAPVGTCEEALQIMFKRYSTIFTRCFLN-----R : 825

A.thaliana : LSEDATEKSCERN-----FFNLIIEHSLAAAKDLLVIQTLLETTAEVM : 869  
H.sapiens : MKEAYTHAQISRNNELKDTLILTGDIGRAAKGDLVPFALLHLLHCLLS : 898  
S.cerevisiae : -KTPYQLLSPILP-----VLLRQLGKNLVERKVGFNLIELLYSS : 717  
C.elegans : LFFDASSAGAQP-----SYDEHRIREITRCYLSHVLSDFNFPNQ : 865

A.thaliana : VAVDVTSELFLLICLFLLLIDQLDHPNLLVRINASKLINRSCYIHVKGGFA : 918  
H.sapiens : KSASVSGAAYTEIRALVAAKSVKLQSFSSQYKKPICQFLVESLHSSQMT : 947  
S.cerevisiae : KTILDIFQRYIIPYAI IQYKSDVLSEIAKIMCDGDTSLINQMKVN---- : 762  
C.elegans : KITFNMIRPSLLYWSLLSSARGINSKLTLSVIDFICQEMSAASVSMSSI : 914

A.thaliana : TLLSTASHIQNELFDNLSVRLTSRPNVVREFAEAVLGVETEELVRKMVP : 967  
H.sapiens : ALPNTPCQNADVRKQDVAHQREMAINTLSEIANVFDFPDLNRFLLTRTLQ : 996  
S.cerevisiae : -----LLKKNSRQIFAVALVKHGLFSLDILETLFLNRAPTFDKGYIT : 804  
C.elegans : SPNPSDIRIVMIQRKSLITETFAQLVQFLAFENNRNTTSFWKFCSDHCD : 963

A.thaliana : AVLPKLLVYWQENAQAANTLNEFAKLIDTDVVPLIVNWLPRVLAFAALNQ : 1016  
H.sapiens : VLLPDLAAKASP--AASALIRTLGKQLNVNRREILINNFKYIFSHLVCS : 1043  
S.cerevisiae : AYLDPDYKTLAEITKLYKNSVTKDAS--DSENANMILCSLRFILITNFEKD : 851  
C.elegans : FKDEDIRTVISSYRKQVFMHLLVVSAREFLNPRNPSMIVEQLRATYENI : 1012

A.thaliana : EEDKNLLSVLQLYHSQIGSDNQEIFAALPALDEIVCFVDIADTPETD : 1065  
H.sapiens : CSKDELERALHYLKNETEIEELGSLLRQDFQGLHNEILLRIGEYHQVFN : 1092  
S.cerevisiae : KRHGSKYKNINNWTDQEQAFQKQLQDNILGIFQVFSS----- : 889  
C.elegans : KKGEKFMISTAIETRNEGIEFLIFRITYFTNDQYFTTREATAESFR--- : 1058

A.thaliana : RR----LQRLPDAIKKISKVLTNAEDLPGFLQNHFVGLLNSIDRKMLHA : 1110  
H.sapiens : GLSILASFASDDDPYQGPRDIISPELMADYLQPKLLGILAFFNMQLLSS : 1141  
S.cerevisiae : -----DIHDVEG : 896  
C.elegans : -----ILLQNMKQDF : 1069

A.thaliana : DD-IFLQKQAIKRKIKLLIEMMG--HYLSTYVPKLMVLLMHAIEKDALQS : 1156  
H.sapiens : SVGIEDKMAIINSLMSIMKLMGPKHVSSVRVKMMTTLRTGLRFKDDFPE : 1190  
S.cerevisiae : RTTYYEKLRVINGISFLIYAPKKSIIISALAQISICLQOTGLGLKEVR-Y : 944  
C.elegans : DTNWIILMTLRQIPLNLDSTQSSWISFIEQINYSILRSNIWRILTDIS : 1118

A.thaliana : EGLLVLHFFTRKLAADVSPSSIKYVISQIFAALIPFLEKEKEGPHVYLDE : 1205  
H.sapiens : LCCRAWDCFVRCLDHACLG---SLLSHVIVALPLIHIQPK-----E : 1229  
S.cerevisiae : EAFRCWHLVLRHLNDEELSTVIDSLIAFILQKWSEFNGKLRN-----I : 987  
C.elegans : RIENNDILIEKVVNRLSYDMVIDKISTDAMIKRVFVWLIPLVEK----R : 1163

A.thaliana : VVKILEELVLKNRDIVKEHICEFPLLPSPISLGELNNAIQEAR----GL : 1250  
H.sapiens : TAAIFHYLIIENRDAVQDFLHEIYFLPDHPELKKIKAVLQYRKETSES : 1278  
S.cerevisiae : VYSILDTLIKEKSDLILKLPYTTLALVGKPELGILARDGQFARMVNKI : 1036  
C.elegans : IDLKFEISKSRQIEDVLEFIRMFPOYPSVQFADNLASKIERKTVYKEEL : 1212

A.thaliana : MSTKQQLRDIVNGMKHENLNVRYMVACELSKLLYNRNEDVAALIAGELV : 1299  
H.sapiens : TDLQTTIQLSMKAIQHENVVRIHALTSLKETLYK-NQEKLIKATDSE : 1326  
S.cerevisiae : RSTTDLIPIFANLQSSNKYVINQNLDDIEVYLRRKQTERSIDFTPKKV : 1085  
C.elegans : PKLIGSLSRILPQCHSKREQNKIKIKLQKLPICSDLPDHNFIWDTRF : 1261

A.thaliana : SDMEILSSLITYLLQGC AEESRTTVGQRLKLV CADCLGATG AIDPAKVR : 1348  
H.sapiens : TVEPIISQLVTVLLKGCQDAN-----SQARLLCGECLGELG AIDPGRLD : 1370  
S.cerevisiae : GQTS DITLVLGALLDTSHKFRN--LDKDLCEKCAKCI SMIGVLDVTKHE : 1132  
C.elegans : KFFCEPRQLTQAVLEDCAGIVEVMTGTSKIEYVDRTMCEIYKFFNPNEA : 1310

A.thaliana : VASCSR-----FKIQCSDDDLIFELIHKHLARAFRAAQDTIIQDSAA : 1390  
H.sapiens : FSTTETQ-GKDFTFVTGVEDSSFAYGLLMELTRAYLAYADNSRAQDSAA : 1418  
S.cerevisiae : FKRTTYSENEVYDLNDSVQTIKFLI WVINDILVPAFWQSENPSKQLFVA : 1181  
C.elegans : SPEMKSTLDGIKNMYAKMICSQKPEPSMIEQKTIDELSLGGSRRRESFSR : 1359

A.thaliana : LAIQEELLKIAGCEPSLAGNVVVLTPQEHVQVNVSGSRRCGGNEVKDRG : 1439  
H.sapiens : YAIQELL SIYDCR-----EMETNGPG : 1439  
S.cerevisiae : LVIQESLKYCGLSSESWDMN-----HKELYPNE : 1209  
C.elegans : WLTVII LKCAEMSED-----APLSSLAS : 1382

A.thaliana : QKLWDRFSNYVKELIAPCLTSRFQLPNVSD--PGSAGPIYRPSMS--FR : 1484  
H.sapiens : HQLWRRFPEHVREILEPHLNTRYKSSQKSTDWSGVKKPIYLSKLGSNFA : 1488  
S.cerevisiae : AKLWEKENSVSKTTIYPLLSLLYLAQSWKEYVPLKYP---SNNFKEGYK : 1255  
C.elegans : IAHVDDTRFLSKLAMRFILTVIHMERDSVTQWQIGILFLTEKTISKIIFI : 1431

A.thaliana : RWLSYWIRKLTAFATGSRVS-IFAACRGIVRHDMQTATYLLPYLVLDVV : 1532  
H.sapiens : EWSASWAGYLI TKVRHDLASKIFTCCSIMMKHDFKVTIYLLPHILVYVL : 1537  
S.cerevisiae : IWVKRFTLDLLKTGT TENHP-LHV FSSLIREDDGSLSNFLLPYISLDII : 1303  
C.elegans : FFPLFSQEKFIKEMHFFRKNNSIFRSAPARERRIGETRKQSPSPFVSTR : 1480

A.thaliana : CHGTEAARLSISEEILSVLDAAASENSGVTINSFGVGQSEVVCVQAVFTL : 1581  
H.sapiens : LGCNQEDQQEVYAEIMAVLKHDDQHT--INTQDIASDLCQLSTQTVFSM : 1584  
S.cerevisiae : IKA EKGPYADILNGIIIEFDSIFT CNLEGMNNLQVDSLRCYESI ERV : 1352  
C.elegans : GDQQHGAIGHLLEFPKMLFFFQILSTFEEALTN TNHRRLTNSDRGPASF : 1529

A.thaliana : LDNLGQWVDDVKQGVALLSSSLQSSGGRQVAPKSKDQVSNSTTEQDHLLV : 1630  
H.sapiens : LDHLTQWARHKFQALKA EKCPH SKSNRNKVD SMVSTVD-----YE : 1624  
S.cerevisiae : FEYCKKWATEFKONYSKLGHTFIIKDTKTTN----- : 1383  
C.elegans : VFYVFDFIYSYSSEELRKKKKIWEKVISFWKS----- : 1562

A.thaliana : QCKYVLELLLAIPKVTLARASFRCQAYARSLMYLESHVVRGKSGSLNPAA : 1679  
H.sapiens : DYQSVTRFLDLIPQDTLAVASFRSKAYTRAVMHFESFITEKKQNIQ--- : 1670  
S.cerevisiae : MLLRIDEFLRTPSDLLAQRSLETDSFERSALYLEQCYRQNPHDKNQ-- : 1430  
C.elegans : MMSWTFKDENGHGQPLIVKVAETFGMEKRCILWLEMFMEQKRRKTSTEIE : 1611

A.thaliana : EKTGIFENADVSSLMGITYSCLDEPDGLSGFAS--LSKSLN-IDQQLLIN : 1725  
H.sapiens : -----EHLGFLQKLYAAMHEPDGVAGVSA--IRKAEPSLKEQILEH : 1709  
S.cerevisiae : -----NGQLLKNLQITYYEIGDIDSLDGVLR--TFATGN-LVSKIEEL : 1470  
C.elegans : S---ETEAAYYFTLMNLYGRIHELNQVVRGAYARLSRIQIDHVYVKIISMR : 1657

A.thaliana : KKSGNWADVFTACEQALQMEPTSVQRHSDVILNCLLNMCCHQTMVTHVDG : 1774  
H.sapiens : ESLGLLRDATAACYDRAIQLEPDQIIHYHGVMKSMGLGLQLSTVITQVNG : 1758  
S.cerevisiae : QYSENWKLQDCFNVLGKFS-DDPKTTTRMLKSMYDHQLYSQIISNSSF : 1518  
C.elegans : EAFGDFNSAACFARMTGKGPFNSTEAIQKILIDELNACLEYSQIERNEQE : 1706

A.thaliana : LISR----VPEYKKTWCTQGVQAARWLGKWDLMDEYLDGADAEGLLFSS : 1819  
H.sapiens : VHAN----RSEWTDDELNTYRVEAAWKLSQWDLVENYLAADGKS----- : 1797  
S.cerevisiae : HSSDGKISLSPDVKEWYSIGLEAANLEGNVQTLKNWVEQIESLR----- : 1562  
C.elegans : DYLNLSKTLSSQWVNIDNDIGPSPHIFSRNIEYWATESTILKMIR----- : 1750

A.thaliana : SDSNASFDRDVAKILHAMMKKDQYSVAEGIAISKQALIAPLAAAGMD-- : 1866  
H.sapiens : ----TTWSVRLGQLLSAKKRDITAFYDSLKLVRAEQIVPLSAASFERG : 1842  
S.cerevisiae : ----NIDDREVLQYNIKALIAISNEDPLRTQKYIHNSFRLIGTNFI : 1606  
C.elegans : -----NDERDEIVNNAIENAKSKVIERLSECAIGGSCSYEIAATPFLV : 1792

A.thaliana : SYTRAYPFVVKLHLIRELEDFQAVLNGDSYLEKSFSTSDQVFSKAVDNW : 1915  
H.sapiens : SYQRGYIYIVRLHMLCELEHSIKPLFQHSPGDSSQEDS-----LNW : 1883  
S.cerevisiae : TSSKETLLKQNLMLKLSLYDLSFLSSAKDKFEYKSN-----TTIL : 1649  
C.elegans : ELQKLNEIVELKNVSNDELSAFNSDEFWKNIQKRTDDSEQ----- : 1831

A.thaliana : ENRLRFTQSSLWTREPLLAFRRLVFGASG---LGAQVGNCWLYAKLCR : 1961  
H.sapiens : VARLEMTQNSYRAKEPILALRRALLSLNKRDPDYNEMVGECWLSARVAR : 1932  
S.cerevisiae : DYRMERIGADFPNHYILSMRKSFDQLKMNEQADADLGKTFFTLAQLAR : 1698  
C.elegans : --KISILEPILRVRRSMLDIRMQSMTGRDKENIRSRIVEVHLQSARIAR : 1878

A.thaliana : LAGHYETAHRAILEAQASG--APNVHMEKAKLLWITKRSDSAIIELOQS : 2008  
H.sapiens : KAGHHQTAYNALLNAGESR--LAELYVERAKWLWSKGDVHQALIVLQK- : 1978  
S.cerevisiae : NNARLDIASESLMHCLERR--LPQAELEFAEILWKQGENDRALKIVQE- : 1744  
C.elegans : LTGCFERAQLSLINAKKVLFPFENKIVLEEAQLQLQTSDELNGMSLIDSI : 1927

A.thaliana : LLNMPEGVVDSTVISSINSLLMAPPNPEPTVRNTQSFKEKKDVAKTLLL : 2057  
H.sapiens : -----GVELCFPENETPPEGKNMLIHG-----RAMLL : 2005  
S.cerevisiae : -----IHEKYQENS SVNARDR---AAVLLK : 1766  
C.elegans : ISKNFG-----DLHTIYTDTQQSVNLDVQKSAKLTIEHYQEETKNLFS : 1970

A.thaliana : YSKWIHHS GQKQKKDVLNLYTQVKELLP--WEKGYFHLAKY YDELYVDAR : 2105  
H.sapiens : VGRFMEETANFESNAIMKKYKDVTA CLPEWEDGHFY LAKY YDKLMPMVT : 2054  
S.cerevisiae : FTEWLDLSNNSASEQI IKQYQDIFQIDSKWDPYYSIGLYYSRLLERKK : 1815  
C.elegans : SVQMLRISHMIKAGNTIG-FDKVYHETTQLLQCFAHSGVMYEAAWLLDY : 2018

A.thaliana : KCQQESSVFSSAGSKKGSVSSNLSTEKAGWDYLFKGMFYAKALHSGHK : 2154  
H.sapiens : DNKME-----KQG-----DLIRYIVLHFGRSLQYGNQ : 2081  
S.cerevisiae : AEGYITNG-----RFEYRAISYFLLAFEKNTA : 1842  
C.elegans : LSNYKERS-----KHVLP LLKAYKEVAKYEKN : 2045

A.thaliana : NLFQA--LPRLLTWFD----FGT---IYKTS GSAGNKEIKSTHMKIMS : 2194  
H.sapiens : FIYQS--MPRMLTWLD----YGTKAYEWEKAGRS DRVQMRNDLGKINK : 2124  
S.cerevisiae : KVREN--LPKVI TWFD----IAAAS--ISEAPGNRKEMLSKATEDICS : 1883  
C.elegans : QVLQARAVERMTSLWLSNTRKISTHISSVPKLP EGQISDLRQNIKSMNR : 2094

A.thaliana : LMRGCIKDLPTYQWLTVLPQLVSRICHQONADTVLMVKNIIITSVLHQFPQ : 2243  
H.sapiens : VITEHTNYLAPYQFLTAFS QLISRICHSHDEVFVVLMEIIIAKVFLAYPQ : 2173  
S.cerevisiae : HVEEALQHCPTYIWYFVLTQLLSRLLHSHQSSAQIIMHILLSLAVEYPS : 1932  
C.elegans : EIQTAL EHGWR AFYPAYAVLARHIDHQDEEVTRTIKQIMKQLILRMPH : 2143

A.thaliana : QGLWIMAAVSKSTVPARREAAAETIQGAR-----KGFNQSDRGH : 2282  
H.sapiens : QAMWMMTAVSKSSYPMRVNRCKEILN-----KA IHMKKSLE : 2209  
S.cerevisiae : HILWYITALVNSNSSKRVLGRKHILE-----KYRQHSQNP : 1968  
C.elegans : QCMWQSAYLLRQNIASVKEKYM EVLTEVVKRKAPCYVTLIDQYDYASGVF : 2192

A.thaliana : NLFIQFASLTDHFIKLCFHGGQPRSK--VINIATEFSALKRMMP----L : 2325  
H.sapiens : KFVGDATRLTDKLELCKNKPVDGSSS--TLSMSTHFKMLKKLVEEATFS : 2256  
S.cerevisiae : DLVSSALDLTKALTRVCLQDVKSITSRSGKSLEKDFKFDNMVAP----S : 2013  
C.elegans : NTVSGKVESDDCKLSEKVDGLKTMFRDKKYDPKELVMNRRVDCDCKILS : 2241

A.thaliana : DIIMPIQQSLTISLPAFHMNNNERHSASVFSGSDLPTISGIADEAEILS : 2374  
H.sapiens : EILIPLQSVMIPTLPSILGTHANHASHEPFG-HWAYIAGFDDMVEILA : 2304  
S.cerevisiae : AMVVPVRKNLDIISPLESNSMRGYQPFPRVVS-----IIRFGSSYKVS : 2057  
C.elegans : GIMVPVRSVIDESVHDTEIRDDGFEECHLFD--RYLIHDFSDKVKVLH : 2288

A.thaliana : SLQRPKKIILLGNDGIEYPFLCKPKDDLKRDARMMEFTAMINRLLSKYP : 2423  
H.sapiens : SLQPKKISLKGSDGKFIIMCKPKDDLKRDCLMEFNSLINKCLRKDA : 2353  
S.cerevisiae : SLKPKQLNIGSDGNIYGIMCK-KEDVRQDNQYMQEATTMDFLLSKDI : 2105  
C.elegans : SNTKPVIIKLTTKTGRIVRLICKKDDLSKDYHFTKMVEMCNLLMKDE : 2337

A.thaliana : ESRRRKLYIRTFAVAPLTEDCGLVEWVPHTRGLRHILQDIYISCGKFDR : 2472  
H.sapiens : ESRRELHIRTAVIPLNDECGIIEWVNNTAGLRPIILTKLYKEKGVYMT : 2402  
S.cerevisiae : ASRKRSIGINIYSVLSLREDCGILEMVPNVVTLRSILSTKYES---LKI : 2151  
C.elegans : QTRIQKMTATTYSVIPLGKQGGIIEFMEGVTSFYETLDKLMGMTS-GEW : 2385

A.thaliana : QKTNPQIKRIYDQCAVKKEYEMLKTKILPMFPVVFHKKWFLTTTFSEPAAW : 2521  
H.sapiens : G-KELRQCMLPKSAALSEKLVKVFREFLLPRHPPIFHFWFLRTFPDPTSW : 2450  
S.cerevisiae : KYSLKSLHDRWQHTAVDGLKLEFYMQVD-KFPPILYQWFLENFPDPINW : 2199  
C.elegans : LEKLFKFWNTHMKPMGKEERTKYFREVACKNTPVVMGKWFRIQYPEAGQW : 2434

A.thaliana : ERSRVAYAHTTAVVSMVGHIVGLGDRHGENILFDSTSGDCVHVDFSCLF : 2570  
H.sapiens : YSSRSAYCRSTAVMSMGYIILGLGDRHGENILFDSLTGECVHVDFNCLF : 2499  
S.cerevisiae : FNARNTYARSYAVMAMVGHILGLGDRHCENILLDIQTGKVLHVDFDCLF : 2248  
C.elegans : FASRKLEAKSTAVMSVIGYIFGLGDRHTKNLMVHTTG-KCIHVDFDMIF : 2482

A.thaliana : DKGLQLEKPELVPPFRLTONMIDGLGITGYEGIFMRVCEITLTVLRTHRE : 2619  
H.sapiens : NKGETFEVPEIIVPPFRLTHNMVNGMGPMGTEGLFRRACEVTMRLMRDQRE : 2548  
S.cerevisiae : EKGKRIIPVEIIVPPFRLTPNLLDALGIIGTEGTFFKKSSEVTIALMRKNEV : 2297  
C.elegans : NKGETLGTPELVPPFRLTONMINGMGEVALDGEFRTVCEQALRVFRENSY : 2531



A.thaliana : TLMSILETFIHDPLVEWTKSHK-----SSGVEVQNPQAQRAISSIEA : 2661  
H.sapiens : PLMSVLKTFLHDPLVEWSKPVKGHSKAPLNETGEVVNEKAKTHVLDIEQ : 2597  
S.cerevisiae : ALMNVIETIMYDRNMDHS-----IQKALKVLRN : 2325  
C.elegans : EIEKYIADLPN-LVADFPSNKR-----APKDFDMSEAKRLVSGRLRG : 2572

A.thaliana : RLQGVVVG-----VPLPVEGQARRLIADAVSLENLTKMYIWWMPWF : 2702  
H.sapiens : RLQGVIKTRNRVTGLPLSIEGHVHYLIQEATDENLLCOMYLGWTPYM : 2644  
S.cerevisiae : KIRGIDPQ----DGLVLSVAGQETETLIQEATSEDNLSKMYIGWLPFW : 2368  
C.elegans : QIMTAKLYRSNPISHPMQVSQCLASSLIELATSEEKLSMYLGMATL : 2619
