# Supplementary material
Source: PubMed Central journal article supplement (PMC1369146)
Supplement: 6-7400479-s4.pdf [file 6-7400479-s4.pdf]

**Supplementary Fig S4** | Sequence alignment of orthologs of *S. cerevisiae* TOR1 and TOR2 (gi 6322526 and 42759860 respectively), human (gi 4826730), *A. thaliana* (gi 22330143), and *C. elegans* (gi 32563909). The FRB domain is highlighted in green. Sequences were aligned using ClustalX.

```

S.cerevisiae2 : MNKYINKYTTPPNLLSLRQRAEGKHRTRKKLTHKSHSHDDEMSTTSNT : 48
S.cerevisiae1 : MEPHEEQIWKS-KLLKAANNMMDMDRNVPLAPNLNVNMMKMNASRNG : 47
A.thaliana : -----MSTSSQSFVAGRPASMASPSQSHRFCGPSATASGG : 35
H.sapiens : -----MLGTGPAAATTAATTSSNVS----- : 20
C.elegans : ---MLQQHGISFQMNADRQNKAAATTSNRIVSAPATNEFDERHRKQID : 45

```

```

S.cerevisiae2 : DSNHNGPNDSGRVITGSAGHIGKISFVDSSELDTTFFSTLNLI FDKL KSD : 96
S.cerevisiae1 : DEFGLTSSRFDGVVIGSN---GDVNFKP-----ILEKIFRELTSD : 84
A.thaliana : GSFD-----TLNRVIADLCSR : 51
H.sapiens : -----VLQQFASGLKSR : 32
C.elegans : AAR-----ALASQYRSRITEN : 61

```

```

S.cerevisiae2 : VPQERASGANELSTTLTSLAREVSAEQFQRFNSLNNKIFELIHGFTS : 144
S.cerevisiae1 : YKEERKLASISLFDLLVSLHEHLSIEEFQAVSNDINNKIILELVHTKKT : 132
A.thaliana : G-NPKEGAPLAFRKHVEEAVRDLSGEASSRFEQLYDRIANLIESTDV : 98
H.sapiens : NEETRAKAAKELQHYVTMELREMSQEESTRFYDQLNHHIFELVSSSDA : 80
C.elegans : RDANQRQAARELSRYVRSSELKDEPNTFSDAFLNAIDGRTDIASQSAIY : 109

```

```

S.cerevisiae2 : SEKIGGILAVDTLISFYLSTEELPNQTS---RLANYLRVLI PPS---D : 186
S.cerevisiae1 : STRVCAVLSIDTLISFYAYTERLPNETS---RLAGYLRGLIPSN---D : 174
A.thaliana : AENMCALRAIDELTEIGFG--ENATKVS---RFAGYMRVTFELKR---D : 139
H.sapiens : NERKGGILAIASLIGVEGG---NATRIG---RFANYLRNLLPSN---D : 119
C.elegans : NCMKSNSNIDQKRAGIYLIIVCLAETHSGNVI RYANYLLKMLNNGNGLD : 157

```

```

S.cerevisiae2 : IEVMRLAANTLGRITVPGGTLTSDFVEFEVVRTCIDWLTTLTADNNS--- : 231
S.cerevisiae1 : VEVMRLAAKTLGKLAVPGGYTSDFVEFEI KSCLEWLTASTEKNSF-- : 220
A.thaliana : PEILVLA SRVLGHLARAGGAMTSDEVEFQMKTAFDWLRVDR----- : 180
H.sapiens : PVVMEMASKAIGRIAMAGDTFTA EYVEFEVVKRALEWLGADR----- : 160
C.elegans : EDTVKMASKAIFLIATCKSYAAELVDRCLDHCHEWLGQNVPHSQQPK : 205

```

```

S.cerevisiae2 : -SSSKLEYRRHAALLI I KALADNSPYLLYPYVNSILDNIWVPLRDAKL : 278
S.cerevisiae1 : -SSSKPDHAKHAALLI I TALAENCOPYLLYQYLNSILDNIWRALRDPHL : 267
A.thaliana : -----VEYRRFAAVLILKEMAENASTVFNVHVPEFVDATWVALRDPQL : 223
H.sapiens : -----NEGRRHAAVLVLRELAI SVPTFFFQVQVQPFDFNIFVAVWDPKQ : 203
C.elegans : NQQEIDQIRRLAASHLSRELALATPTAFFLRVNLFFKYIFNAVRDKNP : 253

```

S.cerevisiae2 : IIRLDAAVALGKCLTIIQDRDPA--LGKQWFQRLFQGCTHGLSLNT-- : 322  
 S.cerevisiae1 : VIRIDASITLAKCLSTLRNRDPQ--LTSQWVQRLATSCEYGFQVNT-- : 311  
 A.thaliana : QVRERAVEALRACLRVIKRETR--WRVQWYYRMFEATQDGLGRNAP- : 268  
 H.sapiens : AIREGAVAALRACLILTTQREPKEMQKPQWYRHTFEEAEKGFDETLAK : 251  
 C.elegans : AVRIAGIDALHVVLTIVSQREAKN--KTEWFKKCFDEALEGQPNPSQK : 299

S.cerevisiae2 : -----NDSVHATLLVFRELLSLK----- : 340  
 S.cerevisiae1 : -----LECIHASLLVYKEILFLK----- : 329  
 A.thaliana : -----VHSIHGSLLAVGELLRNT----- : 286  
 H.sapiens : EKGMRDDRIHGALLILNELVRISSEMEGERLREEMEEITQQQLVHDKY : 299  
 C.elegans : DD----LDRWHAVALILNELLRISDQRFELIRCESSQFIKQKFLKEDE : 343

S.cerevisiae2 : ----- : -  
 S.cerevisiae1 : ----- : -  
 A.thaliana : ----- : -  
 H.sapiens : CKDLMGFGTKPRHITPFTSFQAVQPQQSNALVGLLGYSSHQGLMGFGT : 347  
 C.elegans : ----- : -

S.cerevisiae2 : -----APYLRDKYDDIYKSTMKYKEYKFDVIRREVYAI : 373  
 S.cerevisiae1 : -----DPFLNQVFDQMCLNCIAYENHKAKMIREKIYQI : 362  
 A.thaliana : -----GEFMSRYREVAEIVLRYLEHRDRLVRLSITSL : 319  
 H.sapiens : SPSPAKSTLVESRCCDLMEEFQVCQWVVKCRNSKNSLQMTILNL : 395  
 C.elegans : -----EEGVEWLVLTKQQTIVESVTARKLVLERFPKILDCVRQI : 382

S.cerevisiae2 : IPLLAAFDPAIFTK-KYLDRIIMVHYLRYLKNIDMNAANNS--DKPFIL : 418  
 S.cerevisiae1 : VPLLASFNPQLFAG-KYLHQIMDNYLEILTNAIPANKIPLHKDDKQPIL : 409  
 A.thaliana : LPRIAHFLRDRFVT-NYLTICMNHILTVLR-IPA-----ERASGF : 357  
 H.sapiens : LPRLAAFRPSAFTDTQYLQDTMNHVLSVCVKEKE-----RTAAF : 434  
 C.elegans : IPLANKTSSTKQSSIYLNNTVLMQLLPRICAFPOCDRTFQTISFDTSF : 430

S.cerevisiae2 : VSIG---DIAFEVGSSISPYMTLILDNIREGLRTRTKFKVRKQF-----E : 458  
 S.cerevisiae1 : ISIG---DIAYEVGPDIAPYVKQILDYIEHDLQTKFKFRKQF-----E : 449  
 A.thaliana : IALG---EMAGALDGELIHYLPTIMSHLRDAIAPR---KGRP-----L : 394  
 H.sapiens : QALG---LLSVAVRSEFKVYLPRVLDITRAALPPKDFAHKRQKAMQVD : 479  
 C.elegans : TILQRNAVAAPAIGMMLSNPDVHATHIEKTISFISAAIKTTNSDVL : 478

S.cerevisiae2 : KDLFYCIGKLACALCPAFKHLNKDILNMLLNCPMSDHMQETLMILNE : 506  
 S.cerevisiae1 : NEIFYCIGRLAVPLGPVLGKLLNRNILLDLMFKCPISDYMQETFQILTE : 497  
 A.thaliana : LEAVACVGNIAKAMGSTVETHV-RDLLDVMFSSLSSTLVDAALDQITI : 441  
 H.sapiens : ATVFTCISMLARAMGPGIQQDI-KELLEPMLAVGLSPALTAVLYDLR : 526  
 C.elegans : DNYFTFLFLFVDAYHEQVTTQI-KAII PQLM DITLSRSLANV LK MIMM : 525

S.cerevisiae2 : KIPSEESTVNSRIINLLSISLSGEEKFIQSNQYDFNNQFSIEKARKSRN : 554  
S.cerevisiae1 : RIPSLLGPKINDELINLVCSTLSGTFPIQPGSPMEIPSFSSRERAREWRN : 545  
A.thaliana : SIPSLLPTVQDRLLDCISLVLKSKSHYSQAKPPVTIVRGS----- : 480  
H.sapiens : QIPQLKKDIQDGLIKMLSLVLMHKPLRHPGMPKGLAHQLASPG----- : 569  
C.elegans : RIPKLRRLNVQDGVMASVYQTLTGLSLIPPKSEPIGRPASP----- : 564

S.cerevisiae2 : QSFMKKTGESNDDITDAQILIQCFKMLQLIHHQYSLTEFVRLITISYI : 602  
S.cerevisiae1 : KNILQKTGESNDDNNDIKIILIQAFRMLKNIKSRFSLVEFVRIVALSYI : 593  
A.thaliana : --TVGMAPQSSDPSCSAQVQLALQTLARFNFKGHDLEFARESVVVYL : 526  
H.sapiens : ---LTTLP EASDVG---SITLALRTLGSFEFEGHSLTQFVRHCADHFL : 611  
C.elegans : --KAILQKAETDPKELQRIVLAVDVLGEFYFSRGALQRI MQYVADYVL : 610

S.cerevisiae2 : EHEDSSVRKLAALTSCLDFIK--DDICKQTSVHALHS-----VSEV : 641  
S.cerevisiae1 : EHTDPRVRKLAALTSCEIYVK--DNICKQTSLHSLNT-----VSEV : 632  
A.thaliana : DDEDAATRKAALCCCRLIANSLSGITQFGSSRSTRAGRRRRLVEEI : 574  
H.sapiens : NSEHKEIRMEAAARTCSRLLTPSIHLISGHAHVVSQTAVQ----VADV : 655  
C.elegans : TADNVEIRLAAVSSCC EMVVPFVGVYKVTSDKRNSLLQT----IYGV : 654

S.cerevisiae2 : LSKLLMIAITDPVAEIRLEILQHLG---SNFDPQLAQPDNLRLLFMAL : 686  
S.cerevisiae1 : LSKLLAITIADPLQDIRLEVLKLN---PCFDPQLAQPDNLRLLFTAL : 677  
A.thaliana : VEKLLRTAVADADVTVRKSI FVALFGN-QCFDDYLAQADSLTAIFASL : 621  
H.sapiens : LSKLLVVGITDPDPDIRYCVLASLD---ERFDAHLAQAE NLQALFVAL : 700  
C.elegans : LRAVCSVIVNDQDVRVRMQVISCFGQMPRPF LAHLAQPEM LEVQFMAL : 702

S.cerevisiae2 : NDEIFGIQLEAIKIIIGRLSSVNPAYVVPSTIRKTLLELLTQIKFSNMPK : 734  
S.cerevisiae1 : HDESFNIQSVAMELVGRLSSVNPAYVIPSIRKILLELLTKIKFSTSSR : 725  
A.thaliana : NDEDLDVREYAI SVAGRLSEKNPAYVLPALRRHLIQLLTYLELSADNK : 669  
H.sapiens : NDQVFEIRELAICTVGR LSSMNP AFVMPFLRKM LIQILTELEHSGIGR : 748  
C.elegans : HDEKLEMQQACVTL LGR LAELNPALVLPRLRLMLLETLSQMQQSGQAR : 750

S.cerevisiae2 : KKEESATLICTLINSSDEVAKPYIDPILDVILPKCQD-----ASSAVA : 777  
S.cerevisiae1 : EKEETASLICTLIRSSKDVAKPYIEPLLNVLLPKFQD-----TSSTVA : 768  
A.thaliana : CREESAKLLGCLVRN CERLILPYVAPVQKALVARLSEGTGVNANNIV : 717  
H.sapiens : IKEQSARMLGHLVSNAPRLIRPYMEPILKALILKLD-PDPDPNPGVI : 795  
C.elegans : LEQHS AKMIAQLAKQSPKFM RPYVGS LMIAMI PKLRN---DQKYAEVT : 795

S.cerevisiae2 : STALKVLGELSVVGGKEMTRYLKEIMPLINTFQDQSNSFKRDAALTT : 825  
S.cerevisiae1 : STALRTIGELSVVGGEDMKIYLKDLFPLIKTFQDQSNSFKREAAALKA : 816  
A.thaliana : TGVLVTVGDLARVGG LAMRQYIPELMPLIVEALMDGA AVAKREVAVST : 765  
H.sapiens : NNVLATIGELAQVSGLEMRKWVDELFIITMDMLQDSSLLAKRQVALWT : 843  
C.elegans : AQVLNAVSEIAVIGGAEIVKNLKLPLFEKLTHMINDSSSLHKREAAALRA : 843

S.cerevisiae2 : LGQLAASSGYVVGPLLDYPELLGILINILKTENNPHIRRGTVRLIGIL : 873  
S.cerevisiae1 : LGQLAASSGYVIDPLLDYPELLGILVNILKTENSQNIIRRQTVTLIGIL : 864  
A.thaliana : LGQVVQSTGYVVTPTYKEYPLLLGLLLKLLKGDLVWSTRREVLKVLGIM : 813  
H.sapiens : LGQLVASTGYVVEPYRKYPTLLEVLNLFKTEQNQGTTRREAIRVLGLL : 891  
C.elegans : IGGICRSTAYVVDPYRDYPSLLDDLRLILKTVMSNTMRREAIKTLGIL : 891

S.cerevisiae2 : GALDPYKHREI-----EVTSNSKSSVEQNAPSIDIALLMQGV : 910  
S.cerevisiae1 : GAIDPYRQKER-----EVTSTTDISTEQNAPPIDIALLMQGM : 901  
A.thaliana : GALDPHVHKKRNQ--QSLSGSHGEVPRGTGDSGQPIPSIDELPVELRPS : 859  
H.sapiens : GALDPYKHKVNIGMIDQSRDASAVSLSEKSSQDSSDYSTSEMLVNMG : 939  
C.elegans : GAIDPYTHKVFTGVSQSSTAISTALS LPISETDSKDPQDIHWFNYE : 939

S.cerevisiae2 : SPSNDEYYPTVVIHNLKILNDPSLSIHHTAAIQAIMHIFQNLGLRCV : 958  
S.cerevisiae1 : SPSNDEYYTTVVIHCCLKILKDPSSLSSYHTAVIQAIMHIFQTLGLKCV : 949  
A.thaliana : FATSEDYYSTVAINSMLRILRDASLLSYHKRVVRSMLIIFKSMGLGCV : 907  
H.sapiens : NLPLDEFYPAVSMVALMRIFRDQSLSHHHTMVVQAITFIFKSLGLKCV : 987  
C.elegans : KCTLEEFYPAITIANLMLMMDLDSQSYAEIAQAIVTIFRSLGDMAP : 986

S.cerevisiae2 : SFLDQIIPGIILVMRSCPPS-----QLDFYFQQLGSLISTIVKQHIRPH : 1001  
S.cerevisiae1 : SFLDQIIPITILDVMRTCSQS-----LLEFYFQQLCSLIIIVRQHIRPH : 992  
A.thaliana : PYPKVLPELFHTVRTSDEN-----LKDFITWGLGTLVSVIRQHIRKY : 950  
H.sapiens : QFLPQVMPTFLNVIRVCDGA-----IREFLFQQLGMLVSVFKSHIRPY : 1030  
C.elegans : LYTEQVI PRLIEVCRATESSNRANLREFFLQQLANFVAIRKHAAPY : 1034

S.cerevisiae2 : VEKTYGVIREFFPIIKLQ-----ITIIISVIESISKALEGEFVKRFV : 1041  
S.cerevisiae1 : VDSIFQAIKDFSSVAKLQ-----ITLVSVIEAISKALEGEFVKRLV : 1032  
A.thaliana : LPELLSLVSELWSSFTLPGPIRPSRGLPVLHLLLEHLCLALNDEFRTYL : 998  
H.sapiens : MDEIVTLMREFWVMNTSIQS-----TIILLIEQIVVALGGEFKLYL : 1071  
C.elegans : MPAIFTIADAWKEDISVK-----MVVIEVLTDMGTAIGNDFSKYT : 1075

S.cerevisiae2 : PETLTFFLDIL-ENDDQSNKRIVPIRILKSLVTFGPNLEDYSHLIMPVIV : 1088  
S.cerevisiae1 : PLTLTLFLVIL-ENDKSSDKVLSRRVLRLLSEFGPNLEGYSHLITPKI : 1079  
A.thaliana : PVILPCFIQVLDGAERFNDYTYVPDILHTLEVFGGTLDEHMHLLLPAL : 1046  
H.sapiens : PQLIPHMLRVF-MHDNSPGRIVSIKLLAAIQLFGANLDDYLHLLLPPI : 1118  
C.elegans : GELIPYLLTVL-QTDKTKERVLTVKVMESIQKLTHCIVQHLHLVLPPL : 1122

S.cerevisiae2 : VRMTEYSA--GSLKKISIIITLGR LAKNINLSEMS SRIVQALVRIINNG : 1134  
S.cerevisiae1 : VQMAEFTS--GNLQRSIIITIGK LAKDVDLFEMS SRIVHSLLRVLSST : 1125  
A.thaliana : IRLFKVDAP-VAIRRDIAIKTLTRVIPCQVVTGHSALVHHLKLVLDGK : 1093  
H.sapiens : VKLFDAPAPLPSRKAALETVDR LTESLDFTDYASRIIHPIVRTLDQS : 1166  
C.elegans : LIILDDFSLKLSIRNTALSITVLHMTQQVDVSA YAPRMMQSWHNNISTA : 1170

S.cerevisiae2 : D-RELTKATMNTLSLLELLOIGTDFVVFVPVINKALLRNRIQHSVYDQL : 1181  
S.cerevisiae1 : TSDELKSKVIMNTLSLLELIOMGTSFATFIPVINEVLMKKHIQHTIYDDL : 1173  
A.thaliana : N-DELRKDAVDALCCIAHALGEDFTIFIESIHKLLEKHRLRHKFEFEI : 1140  
H.sapiens : P--ELRSTAMDTLSSLVFQLGKKYQIFIPMVNKVLRHRINHQRYDVL : 1212  
C.elegans : E---MRDKLLLLLIEIIKQLGKFFDIFKRGVDQKLRDYNLDKSVHYEQ : 1215

S.cerevisiae2 : VNKLLN-----NECLPTN----- : 1194  
S.cerevisiae1 : TNRILN-----NDVLPTK----- : 1186  
A.thaliana : HARWRRREPLIVATTATQQLSRR----- : 1163  
H.sapiens : ICRIVKGYTLADEEEDPLIYQHR----- : 1235  
C.elegans : YRKLAQRAQMSRDVLTSSVFAGSNGNIQYSSTQAGMRGQANNVYANND : 1263

S.cerevisiae2 : -----IIFDKENE-VPERKNY : 1209  
S.cerevisiae1 : -----ILEANTTDYKPAEQME : 1202  
A.thaliana : -----LPVEVIRDPVIENEID : 1179  
H.sapiens : -----MLRSGQGDALASG--- : 1248  
C.elegans : LHERLMNGSIDSGASRQDNRDDYYRYGVEEKISEEVPKVAPTARPTS : 1311

S.cerevisiae2 : EDEMQVTK-LPVNQNILKNAWYCSQQKTKEWQEWIRRLSIQLLKESP : 1256  
S.cerevisiae1 : AADAGVAK-LPINQSVLKSANSSQQRTKEWQEWSKRLSIQLLKESP : 1249  
A.thaliana : PFEEGTDRNHQVNDGRRLRTAGEASQRSTKEWEEWMRHFSIELLKESP : 1227  
H.sapiens : PVETGPMKKLHVSTINLQKAWGAARRVSKDDWLEWLRRLSLELLKDS : 1296  
C.elegans : ELVTVQITKQRLNKDALMPQWKNEENLTSKDEWLQWLMKIRIGFLTYS : 1359

S.cerevisiae2 : SACLRS CSSLVSVYYPLARELFNASFSSCWVELQTSYQEDLIQALCKA : 1304  
S.cerevisiae1 : SHALRACSNLASMYYPLAKELFNTAFACVWTELYSQYQEDLIGSLCIA : 1297  
A.thaliana : SPALRTC AKLAQLQPFVGRELF AAGFVSCWAQLNESSQKQLVRSLEMA : 1275  
H.sapiens : SPSLRSCWALAQAYNPMARDLFNAAFVSCWSELNEDQODELIRSIELA : 1344  
C.elegans : SPSLRAASSLGDQHPHLARDLFPAAFMVWTELDSDVQNDLTSCLLRA : 1407

S.cerevisiae2 : LSSSENPPETIYQMLLNLVEFMEHDDK-PLPTIP----IHTLGKYAQKCH : 1347  
S.cerevisiae1 : LSSPLNPPEIHQTLNLVEFMEHDDK-ALPTIP----TQSLGEYAERCH : 1340  
A.thaliana : FSSPNIPPEILATLLNLAEFMEHDEK-PLPTID----IRLLGALAEKCR : 1318  
H.sapiens : LTS-QDIAEVTQTLNLAEFMEHSDKGPLPLRDDNGIVLLGERAAKCR : 1391  
C.elegans : IST--GIPELIQTIILNLAEFMDHSEKGPLPTIS----HDVLRWAEQTK : 1449

S.cerevisiae2 : AFAKALHYKEVEFLEEPKN-----STIEALISINNQLHQT : 1382  
S.cerevisiae1 : AYAKALHYKEIKFIKEPEN-----STIESLISINNQLNQT : 1375  
A.thaliana : VFAKALHYKEMEFEGPRSKRMDANP-----VAVVEALIHINNQLHQH : 1360  
H.sapiens : AYAKALHYKELEFQKGPTP-----AILESISINNKLQQP : 1426  
C.elegans : AFAKACRYKEMSVLKKSGSMQTTFTTRKVKLEPNDCQSLITYANKLNVQ : 1497

S.cerevisiae2 : DSAIGILKHAQQHN-ELQLKETWYEKLQRWEDALAAAYNEKEAAGED-- : 1427  
S.cerevisiae1 : DAAIGILKHAQQHH-SLQLKETWFEKLERWEDALHAYNEREKAGDT-- : 1420  
A.thaliana : EAAVGILTYAQQHL-DVQLKESWYEKLQRWDDALKAYTLKASQTTNPH : 1407  
H.sapiens : EAAAGVLEYAMKHFGELEIQATWYEKLHEWEDALVAYDKKMDTNKD-- : 1472  
C.elegans : EEAAGVRYAERNEMNFQMRGRWYEKLNWEKALGAYELEEEKKSSCP : 1545

S.cerevisiae2 : -----SVEVMMGKLRSLYALGEWEELS----- : 1449  
S.cerevisiae1 : -----SVSVTLGKMRSLHALGEWEQLS----- : 1442  
A.thaliana : -----LVLEATLGQMRCLAALARWEELN----- : 1430  
H.sapiens : -----DPELMLGRMRCLEALGEWGQLH----- : 1494  
C.elegans : NLQVYDEKDHLMTPEEAATAEARMHEMRCLEALGRWDELNSKSVVWA : 1593

S.cerevisiae2 : -----KLASEKWTAKPEVKKAMAPLAAGAAWGLEQWDEIAQYTSVMK : 1492  
S.cerevisiae1 : -----QLAARKWKVSKLQTKKLIAPLAAGAAWGLGEWDMLEQYISVMK : 1485  
A.thaliana : -----NLCKEYWSPAEPSARLEMAPPMAAQAANNMGEWDQMAEYVSRLD : 1473  
H.sapiens : -----QQCCEKWTLVNDETQAKMARMAAAAAWGLGQWDSMEEYTCMIP : 1537  
C.elegans : DQRGNRNDSVRDEINKKQLDHKMAVIAARGAWAVDNWERMADYVSVIS : 1641

S.cerevisiae2 : SQ-----SPDKEFYDAIILCLHRNNFKKAEVHIFNAR : 1523  
S.cerevisiae1 : PK-----SPDKEFFDAIILYLHKNDYDNASKHILNAR : 1516  
A.thaliana : DGDETKLRGLASPVSSGDGSSNGTFFRAVLVRRAKYDEAREYVERAR : 1521  
H.sapiens : RD-----THDGAIFYRAVLALHQDLFSLAQQCIDKAR : 1568  
C.elegans : EN-----TQDGAMLRVVAVHNDENTKAMGLIEKVR : 1672

S.cerevisiae2 : DLLVTELSALVNESYNRAYNVVRAQIIAELEEEIIKYKKLPQN----S : 1567  
S.cerevisiae1 : DLLVTEISALINESYNRAYSVIVRTQIITEFEIIEIKYKQLPPN----S : 1560  
A.thaliana : KCLATELAALVLESYERAYSNMVRVQQLSELEEVIEEYITLPGNTIAE : 1569  
H.sapiens : DLLDAELTAMAGESYSRAYGAMVSMCHLSELEEVIOYKLVPER----- : 1611  
C.elegans : EMIDSELTAMANESYERAYIPMVSVQMAELEEAIEYKTRPER----- : 1715

S.cerevisiae2 : DKRLTMRETWNTRLLGCCQKNIDVWQRIILRVRSLVIKPKEDAQVRIKFA : 1615  
S.cerevisiae1 : EKKLHYQNLWTKRLLGCCQKNVDLWQRVLRVRSLVIKPKQDLQIWKFA : 1608  
A.thaliana : ERRALIRNMWTRIQIGSKRNVEVWQALLAVRALVLPPTEDVETWLKFA : 1617  
H.sapiens : --REIIRQIWWERLQGCQRIVEDWQKILMVRSLVVS PHEDMRTWLKYA : 1657  
C.elegans : --RPRIALLWSRRLQGCRRNVEQWQRLIMLRGLVLS PQEMHPLRVKFS : 1761

S.cerevisiae2 : NLCRKSGRMALAKKVLNLTLL EETDDPDHP-NTAKASPP-VVYAQLKYL : 1661  
S.cerevisiae1 : NLCRKSGRMRLANKALNMLLEGGNDPSLP-NTFKAPPP-VVYAQLKYI : 1654  
A.thaliana : SLCRKSGRISQAKSTLLKLLPFDPEVSPE-NMQYHGPPQVMLGYLKYQ : 1664  
H.sapiens : SLCGKSGRLALAHKTLVLLLGVDPQRQLD-HPLPTVHPQVTYAYMKNM : 1704  
C.elegans : SMCRKQGNMSRAVIRELLSLPANSDLVRAKAPFDKPLLVLALAKQL : 1809

S.cerevisiae2 : WATG---LQDEALKQLINFTSRMAHDLGLDPNNMIAQSVPPQSKRVPR : 1706  
S.cerevisiae1 : WATG---AYKEALNHIGFTSRLAHDGLGLDPNNMIAQSVKLSASTAP : 1699  
A.thaliana : WSLGEERKRKEAFTKIQILTRELS-SVPHSQSDILASMVSSKGANVP- : 1710  
H.sapiens : WKSA---RKIDAFQHMQHfVQTMQ---QQAQHAIATEDQQHKQELH- : 1744  
C.elegans : YQDD---HKDEAIRALEDLANHWNKRINPIPKATGRELIPPSTKEPAR : 1854

S.cerevisiae2 : HVEDYTKLLARCFLKQGEWRVCLQPKWRLSNP----- : 1738  
S.cerevisiae1 : YVEEYTKLLARCFLKQGEWRIATQPNWRNTNP----- : 1731  
A.thaliana : -----LLARVNLKIGTWQWALSSGLNDGSI----- : 1735  
H.sapiens : -----KLMARCFLKIGEWQLNLQG-INESTI----- : 1769  
C.elegans : -----ICAKVLLKIGEWTELKSKTSNNMQVGELSFVRQQVSPQYRT : 1895

S.cerevisiae2 : -----DSILGSYLLATHFDNTWYKAWHNWALANFEVISMLTS : 1775  
S.cerevisiae1 : -----DAILGSYLLATHFDKNWYKAWHNWALANFEVISMVQE : 1768  
A.thaliana : -----QEIRDAFDKSTCYAPKWAKAWHTWALFNTAVMSHYIS : 1772  
H.sapiens : -----PKVLQYYSAAATEHDRSWYKAWHAWAVMNF EAVLHYKH : 1806  
C.elegans : KESRTPETIAFENTINYQQATQYDPGWHKVVWHKLASTHE YAVCRERP : 1943

S.cerevisiae2 : VSKKKQEGSDASSVTDIN----EFDNGMIGVNTFDAKEVHYSSN---- : 1815  
S.cerevisiae1 : ETKLNKGKNDDDDDTAVNNDNVRIDGSILGSGSLTINGNRYPLE---- : 1812  
A.thaliana : RGQ----- : 1775  
H.sapiens : QNQARDEKKKLRHASGANITNATTAATTAATATTTASTEGRSSESEAE : 1854  
C.elegans : HPTTVISPPQQPQQPKMHI PPVTRATSPPPPAQKSPQPAPFHSITEP : 1991

S.cerevisiae2 : ----- : -  
S.cerevisiae1 : ----- : -  
A.thaliana : ----- : -  
H.sapiens : STENSPTPSP-----LQKKVTED : 1872  
C.elegans : LSDYPVPPPLGSLVGLPPMPAYLSSNSLPPQHHSVPLSNDSPSNSA : 2039

S.cerevisiae2 : ---LIHRHVIPAIAKGGFFHSISLSE----SSSLQDALRLLTLWFTFG- : 1854  
S.cerevisiae1 : ---LIQRHVVPAIAKGGFFHSISLLE----TSCLQDTLRLTLWLNFG- : 1851  
A.thaliana : ---IASQYVVS AVTGYFYSIACAANAKGVDDSLQDILRLLTLWFNHG- : 1819  
H.sapiens : LSKTLLMYTVP AVQGGFFRSISLSR----GNNLQDTLRVTLWFDYG- : 1914  
C.elegans : ENKLYLKHAHAH AVRCFAKALMCSP----GSRLEDTLRLMQLWFDHGD : 2082

S.cerevisiae2 : -GIPEATQAMHEGFNLIQIGTWLEVL PQLISRIHQPN-QIVSRSLLSL : 1900  
S.cerevisiae1 : -GIKEVSOAMYEGFNLMKIENWLEVL PQLISRIHQPD-PTVSNLSLSL : 1897  
A.thaliana : -ATADVQTALKTGFSHVNIINTWLVLVLPQIIARIHSNN-RAVRELIQSL : 1865  
H.sapiens : -HWPDVNEALVEGVKAIQIDTWLQVLPQLIARIDTPR-PLVGRLIHQI : 1960  
C.elegans : DKDQDVYFALTETIFDL PVTTWLEAIPQLMARLDCPDDQKSVQLVLRV : 2130

S.cerevisiae2 : LSDLGKAHPQALVYPLMVAIKSESLSRQKAALSIIEKMRIHSPVLVDQ : 1948  
S.cerevisiae1 : LSDLGKAHPQALVYPLTVAIKSESVSRQKAALSIIEKIRIHSPVLVNDQ : 1945  
A.thaliana : LIRIGENHPQALMYPLLVAACKSISNLRRAAAQEVVDKVRQHS GALVDQ : 1913  
H.sapiens : LTDIGRYHPQALIYPLTVASKSTTTARHNAANKILKNMCEHSNTLVQQ : 2008  
C.elegans : LCEIARHRPQAVIYALTVASRSKDVHRSKNAGTVLEKMMMEYHSKLVRE : 2178

S.cerevisiae2 : AELVSHLIRMAVLWHEQWYEGDDASRQFFGEHNTEKMF AALEPLYE : 1996  
S.cerevisiae1 : AELVSHLIRVAVLWHELWYEGLEDASRQFFVEHNIEKMFSTLEPLHK : 1993  
A.thaliana : AQLVSHLIRVAAILWHEMWHEALEEASRLYFGEHNIEGMLKVLEPLHD : 1961  
H.sapiens : AMMVSEELIRVAAILWHEMWHEGLEEASRLYFGERNVKGMEVLEPLHA : 2056  
C.elegans : ASLVTEELVRCAILWHEQWHDALDDASRVYFHDNNVQAMFDALRNMD : 2226

S.cerevisiae2 : MLKR----GPETLRETSFQNSFGRDLNDAYEWMNYYKSKDVSNLNQA : 2040  
S.cerevisiae1 : HLGNI----EPQTLSEVSFQKSFGRDLNDAYEWNYYKSKDINNLNQA : 2037  
A.thaliana : MLDEGVKKDSTTIQERAFIEAYRHELKEAHECCCNYYKITGKDAELTQA : 2009  
H.sapiens : MMER----GPQTLKETSFNQAYGRDLMEAEWCRKYMKSGNVKDLTQA : 2100  
C.elegans : LMQKG---APTMTKEHSFQQTYSDDLKEAGRYVQAFESSGNVKDLNQA : 2271

S.cerevisiae2 : WDIYYNVFRKIGKQLPOLQTLLELQHVSPKLLSAHDLELAVPGTRASGG : 2088  
S.cerevisiae1 : WDIYYNVFRKITRQIPOLQTLDLQHVSPQLLATHDLELAVPGTYFFG- : 2084  
A.thaliana : WDLYYHVFKRIDKQLASLTTLDLESVSPPELLCRDLELAVPGTYRAD- : 2056  
H.sapiens : WDLYYHVFRRISKQLPOLTSLELQYVSPKLLMCRDLELAVPGTYDPN- : 2147  
C.elegans : WEIYCSVFKKLRDQLATLNSLDLVYVSPNLVSAKDLELVVPGTYDPS- : 2318

S.cerevisiae2 : KPIVKISKFEFVFSVVISKQRPKFCIKGSDGKDYKYVLKGHEDIROD : 2136  
S.cerevisiae1 : KPTIRIAKFEPLFSVVISKQRPKFSIKGSDGKDYKYVLKGHEDIROD : 2132  
A.thaliana : APVVTISSEFSRQLVVISKQRPKRLTIHGNDGEDYAFLLKGHEDIROD : 2104  
H.sapiens : QPIIRIQSIAPSLQVVISKQRPKRLTLMGSDNGHEFVFLKGHEDIROD : 2195  
C.elegans : APIVSTIQSESSKMNVISKQRPKRMVIRGSDGLDYQFLKGHEDIPROD : 2366

S.cerevisiae2 : SLVMQLFGLVNTLLQNDAECFRRHLDIQQYPAIPLSPKSGLLGWVPNS : 2184  
S.cerevisiae1 : SLVMQLFGLVNTLLKNDSECFKRHLDIQQYPAIPLSPKSGLLGWVPNS : 2180  
A.thaliana : ERVMQLFGLVNTLLENRSRKTAEKDLISIQRYSVIPLSPNSGLIGWVPNC : 2152  
H.sapiens : ERVMQLFGLVNTLLANDPTSLRKNLSIQRYAVIPLSTNSGLIGWVPHC : 2243  
C.elegans : ERVMQLFGLVNTLLANNSETCRNLTIQRYSIVALSKDSGLIGWVPNC : 2414

S.cerevisiae2 : DTFHVLIREHREA-KKIPLNIEHWVMLQMAPDYDNLTLLOKVEVFTYA : 2231  
S.cerevisiae1 : DTFHVLIREHRDA-KKIPLNIEHWVMLQMAPDYENLTLLOKIEVFTYA : 2227  
A.thaliana : DTLHHLIREHRDA-RKIILNQENKHMLSFAPDYDNLPLIAKVEVFEYA : 2199  
H.sapiens : DTLHALIRDYREK-KKILLNIEHRIMLRMAPDYDHLTLMOKVEVFEHA : 2290  
C.elegans : DTLHTLVKEYREKKAKIPLSIEHKTLOKLSLETEHLLTLMOKLQLFESA : 2462



S.cerevisiae2 : LNNTEGQDLYKVLWLKSRSEETWLEERRTTYTRSLAVMSMTGYILGLGD : 2279  
S.cerevisiae1 : LDNTKGQDLYKILWLKSRSEETWLEERRTTYTRSLAVMSMTGYILGLGD : 2275  
A.thaliana : LENTEGNDLSRVLWLKSRSEVWLEERRTTYTRSLAVMSMVGYILGLGD : 2247  
H.sapiens : VNNTAGDDLAKLLWLKSPSEVWFDRTTYTRSLAVMSMVGYILGLGD : 2338  
C.elegans : LSVTQGEDLRHVLWLKSPSEVWFDRTTYTRSVACMSMVGYILGLGD : 2510

S.cerevisiae2 : RHPSNLMLDRITGKVIHIDFGDCFEAAAILREKFPEKVPFRLTRMLTYA : 2327  
S.cerevisiae1 : RHPSNLMLDRITGKVIHIDFGDCFEAAAILREKYPEKVPFRLTRMLTYA : 2323  
A.thaliana : RHPSNLMLHRYSGKILHIDFGDCFEASMNREKFPEKVPFRLTRMLVKA : 2295  
H.sapiens : RHPSNLMLDRLSGKILHIDFGDCFEVAMTREKFPEKIPFRLTRMLTNA : 2386  
C.elegans : RHPSNLMLDRLTGKVVHIDFGDCFEVAMLRREKFPERVPFRLTRMLINA : 2558

S.cerevisiae2 : MEVSGIEGSFRITCENVMKVLKRDNKGSLMAILEAFVFDPLINWG---- : 2371  
S.cerevisiae1 : MEVSGIEGSFRITCENVMRVLRDNKESLMAILEAFVLDPLIHWG---- : 2367  
A.thaliana : MEVSGIEGNFRSTCENVMQVLRRTNKDSVMAMMEAFVHDPLINWRLNLF : 2343  
H.sapiens : MEVTGLDGNRYRITCHTVMEVLRREHKDSVMVAVLEAFVYDPLINWRLMDT : 2434  
C.elegans : MEVTGLDGVYNYTAERVVLRKMLRRTNQESLLAVLEAFVYDPVINWRLVEG : 2606

S.cerevisiae2 : FDLPTKKIEEETG--IQLPVMNANELLSNGAITEEEVQRVENEH---- : 2413  
S.cerevisiae1 : FDLPPQKLTEQTG--IPLPLINPSELLRKGAITVEEAAANMEAEEQ---- : 2409  
A.thaliana : NEVPQLALLGNNPNAPADVEPEDEDEDPADIDLPPQQRSTREKEILQ : 2391  
H.sapiens : NTKGNKRSRTRTDSYSAGQSVEILDGVELGEPAHKKTGTTVPEESIHSF : 2482  
C.elegans : MKKDPKTRKDTGGRQNMAGAVLPS----- : 2630

S.cerevisiae2 : -----KNAIRNARAMLVLRITDKLITG-----NDIRRFN-- : 2442  
S.cerevisiae1 : -----QNETKNARAMLVLRITDKLITG-----NDIKRFN-- : 2438  
A.thaliana : AVNMLGDANEVLRNERAVVVMARMSHKLITGRDFSSSAIIPSNPIADHNNL : 2439  
H.sapiens : IGDG-LVKPEALNKKAIQIINRVRDKLITG-----RDFSHDD-- : 2517  
C.elegans : -----SSTDSIMETIKRKLITG-----TEFVHTDG- : 2655

S.cerevisiae2 : -----DLDVPEQVDKLIQQATSVENLCQHYIGWCPFW : 2474  
S.cerevisiae1 : -----ELDVPEQVDKLIQQATSIERLCQHYIGWCPFW : 2470  
A.thaliana : LGGDSHEVEHGLSVKVVQVQKLIQQATSHENLCQNYIGWCPFW : 2481  
H.sapiens : -----TLDVPTQVELLIKQATSHENLCQCYIGWCPFW : 2549  
C.elegans : -----STPPEPLQVTEQLAMLEQATSPNLNLCQSYIGWCPFW : 2692
