# Supplementary material
Source: PubMed Central journal article supplement (PMC1369146)
Supplement: 6-7400479-s6.pdf [file 6-7400479-s6.pdf]

**Supplementary Fig S6** | Sequence alignment of orthologs of *C. elegans* SMG-1 (gi 25150275), human (gi 18765739), and from *O. sativa* (gi 50918505). Sequences were aligned using ClustalX.

```

H.sapiens : MSRRAPGSRLSSGGTNYRSWNDWQPRTDSASADPGNLKYSSSRDRGGS : 49
C.elegans : ----- : -
O.sativa : -----MQNPRPPYAAHHQLQQHLASLLS : 23

H.sapiens : SSYGLQPSNSAVVSRQRHDDTRVHADIQNDEKGGYSVNGGSGENTYGRK : 98
C.elegans : -----MITSRNNDIG-----N : 11
O.sativa : AAAGEPPHPSDDASRAAALSILRLSLLHPPNRP-----LLP : 59

H.sapiens : SLGQELRVNNVTSPEFTSVQHGSRAIATKDMRKSQERSMSYSDESRLSN : 147
C.elegans : LIEQFRQRDTPQKERKAILARIEEILQITKNVESLCVKWTYLLDNLWCP : 60
O.sativa : SLAHFIAPPISVLLADDASYAVRRAAVSAYAALCAVLCHEAPGGIPDR : 108

H.sapiens : LLRRITREDDRRRLATVKQLKEFIQQPENKLVLVKQLDNI LAAVH DVL : 196
C.elegans : SLTKHDRNDMKTLAGKVIRLVGVLLFDTESYPEFLIYLGTLIYQSVTKKS : 109
O.sativa : FVAWGLPLLGEPTSALLAEGLRELLATGDVBAVERFVPP LLAACR DVL : 157

H.sapiens : NESSKLLQELRQEGACCLGLLCASLSYEAEKIFKWI FSKFSS SAKDEVK : 245
C.elegans : EETR-----ADIVFSVYFIVGVISQKTENR : 134
O.sativa : EDER-----TSLTVLRCLLGLLTLVAAKFPH : 183

H.sapiens : LLYLCATYKALETVGEKKAFSSVMQIVMTSLQSILENVDTPPELLCKCVK : 294
C.elegans : LI-----ATDTENVEKSLDWI IKVLPNSSISVYN-----HCLK : 167
O.sativa : CFR----PQFVDIVDLLLGWVFPDLAESDRSTIMDS--FLQFQWHWLG : 226

H.sapiens : CILLVARCYPHIFSTNFRDITVDILVGWHIDHTQKPSLTQQVSGWLQ SLE : 343
C.elegans : GFVLVANTFPNVYAAMFESTLRAILTNLPDFNSHEKNFELLIDTVMRFS : 216
O.sativa : NLQFSLGLLPKFLADMEVLVHDPNLAASHNSGRLRPLFACFSTVLQIMA : 275

H.sapiens : PFWVADLAFSTTLLGQFLEDMEAYAEDLSHVASGESVDEEDVPPPSVSLP : 392
C.elegans : DQLNEKPHLAEMVRIIRPDIKKNGLGNMRELKKR---MKLTMALVKMA : 262
O.sativa : SGVAERNSLKELIAGPLEGLSPQLLRCA SVIASKLGWSERMEEASRCLV : 324

```

H.sapiens : KLAALLRVFSTVVRSIGERFSPIRGPPITEAYVTDVLYRVMRCVTAAANQ : 441  
C.elegans : KSQKMLEETNQMISEMSIELEENGKK-----WSSASLITIVCD : 300  
O.sativa : LLAELIQERFAEFYGMFVDVLAQSLEVASSVQLVAATKTNLQVLSLQNL : 373

H.sapiens : VFFSEAVLTAANECVGVLLGSLDPSMTIHCMDVITYGLDQLENCQTCGT : 490  
C.elegans : VFN--ELLLLGKDDVKLQKGVVEESLCNVLKDNLNSN-----QST : 337  
O.sativa : GLRASAVEALLDFSSFLSRLRHPNHTMVTNVATTYLFVLQHGLEDVVD : 422

H.sapiens : DYIISVLNLLTLIVEQINTKLPSSFVEKLFIPSSKLLFLRYHKEKEVVA : 539  
C.elegans : MEKQAFFNSLAKIVKQLPAESQVKTRVHQIVFNTETGLFTPKNRDNRMF : 386  
O.sativa : QATISSLMKELELLKSLLETGRASYPDIQNLSLGSNSETQSKSNSSTFSL : 471

H.sapiens : VAHAVYQAVLSLKNIPVLETAAYKLILGEMTCALNNLHSLQLPEACSEI : 588  
C.elegans : GHNMIYKDLINLVSVLLTPTSLNHLQATYTDLRKIMIDSMSR-----L : 429  
O.sativa : VGYSEHQLLSLMKFDLKILLATISVDTKKRNDKAASLTSFIS-----A : 514

H.sapiens : KHEAFKKNHVFNVDNAKEVVKFDLSAITTIGNAKNSLIGMWALSPTVFAL : 637  
C.elegans : KQSEDTPTYSDNIRWNESILLFFSSLOSISCAKSSLIVMMGIRPSIEFEF : 478  
O.sativa : KLDPFGTPTFHDFLEMQFHIFSLHRLSSMDLSS-TIAPSKANGSGDSGS : 562

H.sapiens : LSKNLMIVHSDLAVHFPAIQYAVLYTLYSHCTRHDHFISSLSSSSPSL : 686  
C.elegans : FSSELPLTEYWLASNHPVYHLFITIFVGHKKAHDFYIVQSDYIVRGDS : 527  
O.sativa : QTQLVIESRKSFCDCCKNKFMHKYGKLVVWGLNASSSMTLKLEALAWIDT : 611

H.sapiens : FDGAVISVTTATKKHFSIILNLLGILLKKNLNQDTRKLLMTWALEAA : 735  
C.elegans : IGQSIGQTKRDYARKQVVALQKIINNFG--DKLWKKTRLMISSWLHSLI : 574  
O.sativa : FGNLVLGMERDVKRNI SYEVHEGATLLNTILFAILDCAYDREPKVR LH : 660

H.sapiens : VLMKKSETYAPLFSLPSFHKFCKGLLANTLVEDVNICLQACSSLHALSS : 784  
C.elegans : ATACEHQIGSDSFSQREWRLRNTVIHQSVLTWNNECVNQALTILSTAT : 623  
O.sativa : VATSLEILFLGRLINPMDFSVVTQVLLDKLSDPDNAVKKGFSRLLSIAL : 709

H.sapiens : SLPDPLLQRCVDVCRVQLVHSGTRIRQAFGKLLKSIPLDVVLSNNNHTE : 833  
C.elegans : KWSELTSDIHRDIADKTKKAKWKEATTIWESGDCNTYIROSMSTVYQMS : 672  
O.sativa : PITTYTFGLLENRWSYQHSPDTANMSKHCMSSWRHVLAVKQQPRKLHWQQ : 758

H.sapiens : IQEISLALRSHMSKAPSNTFHPQDFSDVISFILYGNSHRTGKDNWLERL : 882  
C.elegans : QERQOKTITSTSTSGAEFFIIITNFLLKQATPTTFKKGQNSWMDEVLETTF : 721  
O.sativa : LVSILSYLSRLKLPSSSWVQRLFFSYRGKKDMFSGQTDVSGDSDGNEL : 807

H.sapiens : FYSCQRLDKRDQSTIPRNLKTDVAVLWQWAIWEAAQFTVLSKLRTPPLGR : 931  
C.elegans : TQGCRTLEKPDSE-----YVPETFIEKWDWIINQANFCIVNKMKTPLGK : 765  
O.sativa : FKGPD-----VDRTIIDRIYSVNNLAAVWVGIIHEAARHCINLRLRTHLGG : 852

H.sapiens : AQDTFQTIIEGIIRSLAAHTLN---PDQDVSQWTTADNDEG----HGNNQ : 973  
C.elegans : PMQTFAAFENEIKRLAKEVIVRKNSDKKLNKSSSTEDPNQSPPLKYSVQW : 814  
O.sativa : PTQTFAAALERMLLDVPNLLAP-----EATEGEGRYIAPSDTSL : 890

H.sapiens : LRLVLLIQYLENLEKLMYNAYEG--CANALTSPPKVIRTFEYTNRQTCQ : 1020  
C.elegans : LRVHLLLKLIVVLEKLMNSAIHGGSSVENLTEIPVSSRQFFTVNAASCE : 863  
O.sativa : LPMRLLLDVFEALKKYVYNAYEG---SEVLPAPPKASSLFFRANKRVCE : 936

H.sapiens : DWLTRIRLSIMRVGLLAGQPAVTVRHGFDLITEMKTTSLSQGNELEVTI : 1069  
C.elegans : VWLNRVYYPALLVAYFNGYYGLVIRFGSNALSHFARQKGD-NDKKIVN : 911  
O.sativa : EWFSRICDPMLNAGLALHCNDAVIHYCSSRLDIRNLAASSLKDNSRMG : 985

H.sapiens : MMVVEALCELHCP EAIQGI AVSSSIVGKNLLWINSVAQQA EGRFEKAS : 1118  
C.elegans : GVCTASLMSLSMAVLGEPMEIVGLRRKRVREEFGTDMGQSLMEALGEMAN : 960  
O.sativa : GATESHHAFRERLEADFLKVLRHASLALCRCHETDALVGLQRWAI STFY : 1034

H.sapiens : VEYQEHICAMTGVDCCISSFDKSVLTLANAGRNSASPKHSLNGESRKTV : 1167  
C.elegans : ARYETALVALEAVLVTDAATNETLKMIIQLA----- : 991  
O.sativa : TYFEQDKQLVRGVSDSQNHFSWMSGLIYQSQ--GKYEKAAAHYSHLLQF : 1081

H.sapiens : LSKPTDSSPEVINYLGNKACECYISIA DWAAVQEWQNAIHDLKKSTSSST : 1216  
C.elegans : -----MVDILNRIRLPQATDYKVVLFGEESN : 1018  
O.sativa : EEGLASMESDGIQYIIARVIECYTSLSDWKCLEGWLSELQVLRVAVHAGK : 1130

H.sapiens : SLN-----LKADFN YIKSLSSFFESGKFEVECTEQLELLPGENINLLAGGS : 1260  
C.elegans : DST-----ITEDFRSVELLTKFEK-----L : 1038  
O.sativa : PYSGALTSAGNELNAVHAMACFDGGDFHS-----A : 1160

H.sapiens : KEKIDMKKLLPNMLSPDPRELQKSIQVQLLRSSVCLATALNPTEQDQKW : 1309  
C.elegans : NNTVNEKRQVVDWSARERFQFVESAFSQTMR-----TELLDIQKDFS- : 1081  
O.sativa : WGYLDLTPKSSSELSDLKVAVERSELMLLRAMLQSHSKPDKAREELNK : 1209

H.sapiens : QSITENVVKYLKQTSRIAIGPLRLSTLTVSQSLPVLSTLQIYCSSLALEN : 1358  
C.elegans : -----AMGALALSADSSCKLYSDISSSTSLIIANLVN- : 1112  
O.sativa : AKLMLDEALSVVPLN--GLTEAAACAGQLYCIFAFEEITTELACPNRTNQ : 1256

H.sapiens : TVSNRLSTEDCLIPLFSEALRSCKQHDVWPWMQALRYTMYQNQLLEKIK : 1407  
C.elegans : -----KMTGVSQWKNKLTDTTEIFDRNEEGND : 1138  
O.sativa : SP-----ALMDYLLRLLQDPIDRINQDCNIWLKIFKVVYCTTQPSS : 1296

H.sapiens : EQTVPIRSHLMELG-LTAAKFARKRGNVSLATRLLAQCSEVQLGKTTTA : 1455  
C.elegans : GDKLAICRKLHWRHTKSNRGQSCAAHSEIIRLSRKTSNCELAFFHIN : 1187  
O.sativa : LPTLLLCQKIASLARKQSNLKLASRLNQYIINHPLSSSDEMEKEMLTIN : 1345

H.sapiens : QDLVQHFKKLLSTQGVVDEKKGPELDIEKTKLLYTAGQSTHAMEMLSSCA : 1504  
C.elegans : SAIRGEKLAAWQRLEVERQR---LKLVKTONLDVRIREMNEVFGSLAEV : 1233  
O.sativa : IKYEGALLKHDQGKKEEALTDLWSLVRATVLSVSDSSGAGTPLIAKAC : 1394

H.sapiens : ISFCKSVKAEYAVAKSILTAKWIQAEWKEISGQ--LKQVYRAHQQNF : 1551  
C.elegans : FTTSCQLKSDFMVDGMIKEKMISEGYNEDIAKR--EFHMSRASIQLAD : 1280  
O.sativa : LKFSTWMERENSTHIMNMILPKVIEDINDSGGFQNGAEKLLLGDNGSVS : 1443

H.sapiens : TGLSTLSKNILTLEIIPSVNTMEEYPRIESESTVHIGVGEPDFILGQL : 1600  
C.elegans : FFQSLPELENVLPNLFPTIIWSELQRRSDLSAGYHG-----IVCSL : 1323  
O.sativa : ASNSHVVSQEIIGIARKTSWQLCPMSGKAWHSYASWCITHANYSLSGTD : 1492

H.sapiens : YHLSVQAPEVAKSWAALASWAYRWGRKVVDNASQGEGVRLLPREKSEV : 1649  
C.elegans : FHLASEMCPSLAKAHLKMARWAYEIA-KIKNFPAENLSFYKFGKDETEN : 1371  
O.sativa : SKLQNSLFPALQS---ELSPDRFHLDNEKSEVQEIIRNFCADKDGNYV : 1538

H.sapiens : QNLLPDTITEEEKERIYGILGQAVCRPAGIQDEEDITLQITESEDNEEDD : 1698  
C.elegans : EELLKS-----LEATSLVNLEKLVRAAISDDL RANN : 1402  
O.sativa : DCSISPITAGCSYNSEGNPITVSLIEQTICLLETAAGAPGSEACDGEGPSV : 1587

H.sapiens : MVDVIWRQLISSCPWLSELDESATEGVTKVWRKVVDRIFSLYKLSCSAY : 1747  
C.elegans : ILAPN-----SHFMHIWKMVRDHRTKFLSIAVTSY : 1432  
O.sativa : RLSSSELTVLFCCKDSAKDSSMTLIGKLEIWWTLRRRRVSLFGHAAHAY : 1636

H.sapiens : FTFLKLNAGQIPLDEDDPRLHLSHRVEQSTDDMIVMATLRLRLLLVKHA : 1796  
C.elegans : FQFIQNMSGDCDN-----LPYSKKEETTLLATLRILELLVKHG : 1469  
O.sativa : FQYLSHSSTGLQPS-----YHRDVLKGGTKSYTLRALLYLHIIILNYG : 1679

H.sapiens : GELRQYLEHGLETTPTAPWRGIIPQLFSRLN-HPEVYVRQSICNLLCRV : 1844  
C.elegans : DVLIDVINDGLNKTNVHIWKEILPQLFARLS-HPSEHIRKTLVDLISKI : 1517  
O.sativa : VELKEIVESSGLSTVPLLPWQEIIPQLFARLSFHPEKIVRKQLESILVKL : 1728

H.sapiens : AQDSPHLILYPATVGTISLSSESQASGNKFSTAIPTLLGNIQGEELLVS : 1893  
C.elegans : CTAAPHAVVFQVVSQAASSSTDG----- : 1540  
O.sativa : GNLSPCSIVYPTLVDINACEGEP----- : 1751

H.sapiens : ECEGGSPPASQDSNKDEPKSGLNEDQAMMQDCYSKIVDKLSSANPTMVL : 1942  
C.elegans : -----EELLEEQQNDDRNRVRACCEKLETNMSQSYPNLVK : 1574  
O.sativa : -----SDELQRILDFLVKQYPKLVK : 1771

H.sapiens : QVQMLVAELRRVTVLWDELWLGVLLOQHMYVLRRIQQLEDEVKRVQNNN : 1991  
C.elegans : DVRQFVAELERINLLNEEKWSVVMGTMEHEMEKRLSLIRTENAKTESAL : 1623  
O.sativa : DVKLAIEELGMVTVLWEEQWLSTLQDLHSDVLRRLINILKEEAARVAANS : 1820

H.sapiens : TLRKEEKIAIMREKHTALMKPIVFALEHVRISITAA-PAETPHEKWFQDN : 2039  
C.elegans : HLTASVKNDIIVKRTQLLTRQIFDVLDELYQQTVIEPPKSKNEEEFVTA : 1672  
O.sativa : TLSSAEKNKINAAKYSAIMTPIVVALERRLASTSR-EPKTSHEVWFHKE : 1868

H.sapiens : YGDAIENALEKLLKTP-LNPAKPGSSWIPFKEIMLSLQORAQKRASYILR : 2087  
C.elegans : FAEVLTNAFQESRIS-RTTS-PEKSWIPFKNLIANFVHRNSKKGMQTFE : 1719  
O.sativa : YNAQLKSAITALKTPPGSPSALGEIWRPFDSIAASLATHLRKS---CIS : 1914

H.sapiens : LEEISPWLAAMTNTETIALPG--EVSARD-----TVTIIHSVGGTI : 2124  
C.elegans : TEDISPYLASLSNSCVPMPGQESVEFDR-----VVSISRVARQV : 1758  
O.sativa : LSEIAPQLAALSTSNIPMPGFEKQIFSSSESSFADSHGTITISSFCKEV : 1963

H.sapiens : TILPTKTKPKKLLFLGSDGKSPYLFKGLLEDLHLDERIMQFLSIVNTMF : 2173  
C.elegans : TILPTKTRPKKLGFEVGS DGKQVAF LFKGREDLHLDERVMQFLRLCNVML : 1807  
O.sativa : TVLS TKTRPKKLVLQGS DGQKYTYLLKGREDLRLDSRIMQLLEAINSFF : 2012

H.sapiens : ATIN---RQETPRFHARHYSVTPLGTRSGLIQWVDGATPLFGLYKRWQQ : 2219  
C.elegans : QPGKGKHRQSVAAAYQAHHYAVIPLGPRSGLIKWVEGATPMFHIYRKWQM : 1856  
O.sativa : YSSS---DTRSRNMAIRFYSVTPI SGRAGLIQWVENVSSIYNVYKWTWQK : 2058

H.sapiens : REAALQAQKAQD---SYQTPQNPGIVPRPSELYYYSKIGPALKTVGLSLD : 2265  
C.elegans : KEKALKQATKKN---GETVP----EIERPSNMYHNMI RLAFA DHKIDSS : 1898  
O.sativa : RSQLAQAQLSSVNTVNNSIHKSVPVPRPSDMFYGKIIPALKEKGIKRV : 2107

H.sapiens : VS--RRDWPLHVMKAVLEELMEATPPNLLIAKELWSSCTTPDEWWRVTQS : 2312  
C.elegans : ITSDRSKWP AEILEEVFE SLTAKTPTDLISRELWMRANDATTWWSVTKR : 1947  
O.sativa : IS--RRDWPLDVKRKVLLELMKETPKQILWQEMWCASEGFRNFNSKVKR : 2154

H.sapiens : YARSTAVMSMVGYYIIGLGDRHLDNVLIDMTTGEVVHIDYNVCFEKGKSL : 2361  
C.elegans : YSRSLAVMSMVGSVLGLGDRHLDNLLVDLKWGHVVHIDYNICFDKGKNL : 1996  
O.sativa : FSSSVAAMSMIGHVLGLGDRHLDNILLMDFSSGDVVHIDYNICFDKGKRL : 2203

H.sapiens : RVPEKVPFRMTQNIETALGVTGVEGVFRLSCEQVLHIMRRGRETLLTLL : 2410  
C.elegans : RIPETVPPFRLTRNMRHALGPSEMYGTFRESCVHVLSTLRSQHQLTMLL : 2045  
O.sativa : KIPEIVPPFRITQTIESALGLTGVEGVFRVTCHEVMAVLLRNKDII LMLL : 2252

H.sapiens : EAFVYDPLVDWTAGGEAGFAGAVYGGGGQQAES-KQSKREMER EITRSL : 2458  
C.elegans : DAFVFDPLVDWTSHEHTATSGVSLALQLAVYGSNWKTKAKERLTDAMEL : 2094  
O.sativa : EVFLWDPLMEWTRGNIQDEAGIAG-----EEKKGMELAVSLSL : 2290

H.sapiens : FSSRVAEIKVNWFKNRDEMLVVLPKLDGSLDEYLSLQEQLT DVEKLQ GK : 2507  
C.elegans : LNLRMSEVQTLWLANRD-----DLLHWMKQVTECLLIENS : 2129  
O.sativa : FSSRIQEIRVPLQEHQDLLVTNLPATLSLKKFLDTLEQYEVISAMFYH : 2339

H.sapiens : LLEEIEFLEGAEG-----VDHPSHTLQHRYS EHTQLQ TQQR AVQEA IQV : 2551  
C.elegans : MLGANAIYAQR-----VKAGTELREAVTRHHALAKELRPLIRVIGK : 2171  
O.sativa : AEKERSSALQSE TSAKSMLAEASSLAEKSR T SFELHAHEL AETKAAAND : 2388

H.sapiens : KLNEFEQWITHYQAAFNNLEATQLASLLQEISTQMDLGPPSYVPAATAFL : 2600  
C.elegans : EREFADYLFYKQAL----- : 2187  
O.sativa : EANKLAVWVEKHGRILEAIRDNSIAGVESCMLNSKDDALSLISAVLES : 2437

H.sapiens : QNAGQAHLISQCEQLEGEVIGALLQRRSVLRGCLEQIHHYATVAIQYPK : 2649  
C.elegans : ----- : -  
O.sativa : EVPLTVVPEPTRAQCSELDREVSQIILELQGLSAAIESLGEYAVLQQL : 2486

H.sapiens : AIFQKHRIEQWKTWMEELICNTTVERCQELYRKYEMQYAPQPPPTVCQF : 2698  
C.elegans : ----- : -  
O.sativa : VLPVNYITTSPVITGWAQALQLSVSSGSEDLLPLAKRQAEEVIKQVQEG : 2535

H.sapiens : ITATEMTLQRYAADINSRLIRQVERLKQEAVTVPVCEQLKEIERCIKV : 2747  
C.elegans : ----- : -  
O.sativa : INLVQQRYRDLLNQMESYVVCIERLARERSELMNSIGFENEVRSKEWIL : 2584

H.sapiens : FLHENGEESLSLASVIISALCTLTRRNLMMEGAASSAGEQLVDITSRD : 2796  
C.elegans : ----- : -  
O.sativa : SAFMNSIQLPSPKRDGMNIPFLQSGNVGVKTPAHEDIQDETGIVLSILG : 2633

H.sapiens : GAWFLEELCSMSGNVTCLVQLLKQCHLVPQDLIPNPMEASETVHLANG : 2845  
C.elegans : ----- : -  
O.sativa : IAVGQLYSDVRAKVSELSSKVTGIAKFRTDEAGLQADAGTSLQLFDQQV : 2682

H.sapiens : VYTSIQELNSNFRQIIFPEAIRCLMKGEYTTLESMLHELDGLIEQTTDGV : 2894  
C.elegans : ----- : -  
O.sativa : EKCALISGFVGEVHGVMEAKIVEMNTAYAKPQHGWASTFQRILCSSTN : 2731

H.sapiens : PLQTLVESLQAYLRNAAMGLEEETHAHYIDVARLLHAQYGEIIPRNGS : 2943  
C.elegans : ----- : -  
O.sativa : MIEQMTQVFLPEIIRSFISYNSQVMEAFGSVSQIRGSVDTALEKLVRIE : 2780

H.sapiens : VDETPKMSAGQMLLVAFDGMFAQVETAFSLVVEKLNKMEIPIAWRKIDI : 2992  
C.elegans : ----- : -  
O.sativa : LERASMTEFEQSYFMKVGRITEQQAIALEEAAMMGRDHLSWEEAEELASQ : 2829

H.sapiens : IREAR**R**STQVNFDDDDNHRQVLEEIFFLKRLQTIKEFFRLCGT**F**SKT**L**SG : 3041  
C.elegans : -----FD**P**LL**K**G : 2194  
O.sativa : EEAC**R**AQLEQLQETWSQKDMTIS**S**LMKVES**S**AMNSLLSSKQ**Y**F**S**S**L**VNV : 2878

H.sapiens : **S**S**S**LE**D**QNTVNGP**V**Q**I**V**N**V**K**T**L**FRNS**C**F**S**EDQ**M**AKPIKAFTAD**F**V**R**Q**L**L : 3090  
C.elegans : H**S**A**L**R**N**E**L**DIDTCVYN**F**N**I**V**M**Q**N**ID**N**V**E**G----- : 2223  
O.sativa : DQES**E**F**H**L**R**RSK**A**LL**S**V**L**T**K**P**L**ADLEALDH**M**L**S**ACGL**F**PYHD**H**C**F**F**V**W**K** : 2927

H.sapiens : I**G**L**P**NQ**A**L**G**L**T**LC**S**F**I**S**A**LG**V**D**I**IAQ**V**EAK**D**FG**A**ES**K**V**S**V**D**DL**C**CK**A**VE : 3139  
C.elegans : ----- : -  
O.sativa : L**S**L**L**S**I**L**D**LC**M**HE**I**S**S**VE**H**S**F**TT**N**Q**L**Y**T**AL**K**TK**L**T**N**H**V**E**K**Q**V**Y**R**Y**I**M : 2976

H.sapiens : H**N**L**I**Q**I**G**K**F**S**Q**L**VM**N**R**A**T**V**L**A**S**S**Y**D**T**A**W**K**K**H**D**L**V**R**R**L**E**T**S**I**S**S**C**K**T**S**L**Q**R : 3188  
C.elegans : ----- : -  
O.sativa : E**R**L**A**P**A**F**I**L**Q**L**D**K**E**I**S**D**L**L**Q**L**S**Q**G**R**R**E**S**G**Q**P**K**R**D**S**A**A**V**G**R**I**A**V**M**L**E**E**Y**C : 3025

H.sapiens : V**Q**L**H**I**A**M**F**Q**W**Q**H**E**D**L**L**I**N**R**P**Q**A**M**S**V**T**P**P**P**R**S**A**I**L**T**S**M**K**K**L**H**T**L**S**Q**I**E**T** : 3237  
C.elegans : ---AL**V**N**L**S**F**T**P**I**E**T**I**T**S**R**T**S**Q**Q**E**F**K**P**P**P**G**L**E**N**V**W**V**K**Q**D**Q**E**N**S**Q**A**R**E : 2269  
O.sativa : N**A**H**E**T**A**R**A**A**R**T**A**V**S**L**M**Q**R**Q**S**N**D**L**T**E**A**L**R**K**I**V**L**E**I**I**Q**V**E**W**L**H**D**L**S**S**P**H**A**Q : 3074

H.sapiens : S**I**A**T**V**Q**E**K**L**A**A**L**E**S**S**I**E**Q**R**L**K**W**A**G**G**A**N**P**A**L**A**P**V**L**Q**D**F**E**A**T**I**A**E**R**N**L**V**L** : 3286  
C.elegans : V**V**R**R**V**E**R**R**L**N**G-----W**L**D**G**S----- : 2285  
O.sativa : K**S**K**V**L**S**Q**N**I**L**S**D**D**K**F**I**S**V**L**L**N**I**S**R**G**N**-----L**L**D : 3103

H.sapiens : **K**E**S**Q**R**A**S**Q**V**T**F**L**C**S**N**I**I**H**F**E**S**L**R**T**R**T**A**E**A**L**N**L**D**A**A**L**F**E**L**I**K**R**C**Q**M**C**S**F : 3335  
C.elegans : ----- : -  
O.sativa : **K**I**Q**S**S**V**S**L**V**T**R**S**I**E**C**L**Q**A**C**E**N**T**S**V**S**A**E**G**Q**L**E**R**A**M**G**W**A**C**A**G**P**N**T**S**G**A**G**S**S** : 3152

H.sapiens : A**S**Q**F**N**S**S**V**S**E**L**E**L**R**L**L**Q**R**V**D**T**G**L**E**H**P**I**G**S**S**E**W**L**L**S**A**H**K**Q**L**T**Q**D**M**S**T**Q**R**A : 3384  
C.elegans : ----- : -  
O.sativa : T**T**K**A**S**G**I**P**S**E**F**H**D**H**L**L**K**R**R**K**L**L**W**V**I**Q**E**Q**A**S**D**L**A**N**I**C**T**S**V**L**E**F**E**G**S**R**D**G**I : 3201

H.sapiens : I**Q**T**E**K**E**Q**Q**I**E**T**V**C**E**T**I**Q**N**L**V**D**N**I**K**T**V**L**T**G**H**N**R**Q**L**G**D**V**K**H**L**L**K**A**M**A**K**D**E**E : 3433  
C.elegans : ----- : -  
O.sativa : Y**L**I**P**E**D**K**S**S**G**Q**S**T**D**R**G**R**T**W**Q**Q**T**F**L**N**L**L**T**R**L**D**A**A**Y**R**S**F**T**C**A**E**Q**E**W**K**L**S**Q**F : 3250



H.sapiens : AALADGEDVPYENSVRQFLGEYKSWQDNIQTVLFTLVQAMQVRSQEHV : 3482  
C.elegans : ----- : -  
O.sativa : NMESAGKSLYSVTNQLSVVSSRAKSALECSVYIFPVNLQDTLVSMYERA : 3299

H.sapiens : EMLQEITPTLKELKTQSQSIYNNLVSFASPLVTDATNECSSPTSSATYQ : 3531  
C.elegans : ----- : -  
O.sativa : SEVTASLSGFKHVSQDRALTSECGSLLEEVLAI AEG----- : 3336

H.sapiens : PSFAAAVRSNTGQKTQPDVMSQNARKLIQKNLAT S ADTPPS TVPGTGKS : 3580  
C.elegans : ----- : -  
O.sativa : -----LH DVYIVGKEAAVMHNSIMS NLSKANT ILLPLEA : 3370

H.sapiens : VACSPKKAVRDPKTGKAVQERN SYAVSVWKRVKAKLEG RDVDPNRRMS- : 3628  
C.elegans : -----AGPDRKLS- : 2293  
O.sativa : SLSADLAVMSEAI SKEREKNNT S MPLIHGKALYQSYIIRIR DAYKNLEP : 3419

H.sapiens : ----VAEQVDYVIKEATNLDNLAQLYEGWTAWV-- : 3657  
C.elegans : ----PREEADILIAEATSTPNLSQMYEGWTAWV-- : 2322  
O.sativa : LVPPLADDAKELHSLMTKLGRLSSIHAGSLHKVLN : 3454
